# Supplementary material
Source: ML conference proceedings conference paper supplement (https://openreview.net/forum?id=GxpkSJjbQR)
Supplement: supplementary_material [file attachment]

## Sheet: Sheet1
'BN.SFG_L_7_1'	'BN.SFG_R_7_1'	'BN.SFG_L_7_2'	'BN.SFG_R_7_2'	'BN.SFG_L_7_3'	'BN.SFG_R_7_3'	'BN.SFG_L_7_4'	'BN.SFG_R_7_4'	'BN.SFG_L_7_5'	'BN.SFG_R_7_5'	'BN.SFG_L_7_6'	'BN.SFG_R_7_6'	'BN.SFG_L_7_7'	'BN.SFG_R_7_7'	'BN.MFG_L_7_1'	'BN.MFG_R_7_1'	'BN.MFG_L_7_2'	'BN.MFG_R_7_2'	'BN.MFG_L_7_3'	'BN.MFG_R_7_3'	'BN.MFG_L_7_4'	'BN.MFG_R_7_4'	'BN.MFG_L_7_5'	'BN.MFG_R_7_5'	'BN.MFG_L_7_6'	'BN.MFG_R_7_6'	'BN.MFG_L_7_7'	'BN.MFG_R_7_7'	'BN.IFG_L_6_1'	'BN.IFG_R_6_1'	'BN.IFG_L_6_2'	'BN.IFG_R_6_2'	'BN.IFG_L_6_3'	'BN.IFG_R_6_3'	'BN.IFG_L_6_4'	'BN.IFG_R_6_4'	'BN.IFG_L_6_5'	'BN.IFG_R_6_5'	'BN.IFG_L_6_6'	'BN.IFG_R_6_6'	'BN.OrG_L_6_1'	'BN.OrG_R_6_1'	'BN.OrG_L_6_2'	'BN.OrG_R_6_2'	'BN.OrG_L_6_3'	'BN.OrG_R_6_3'	'BN.OrG_L_6_4'	'BN.OrG_R_6_4'	'BN.OrG_L_6_5'	'BN.OrG_R_6_5'
51	120	85	74	60	78	57	62	93	75	68	70	74	65	80	63	60	32	76	86	61	59	78	74	68	98	62	72	61	72	50	56	68	69	57	53	47	93	40	46	65	80	26	43	15	38	42	28	17	20
53	59	25	46	20	25	81	55	49	129	23	23	33	24	89	98	34	42	50	41	45	22	44	46	44	37	45	45	25	20	19	27	22	15	16	17	64	122	29	39	56	45	30	24	61	18	34	50	101	65
89	95	85	74	45	77	126	111	127	117	95	64	80	58	97	75	83	52	55	53	136	73	62	113	81	111	66	27	45	52	49	53	58	38	43	57	72	85	79	89	79	63	30	39	34	23	46	71	36	32
88	137	75	107	50	87	78	108	137	44	87	64	58	87	81	109	73	151	20	113	51	111	49	116	69	118	15	46	76	129	38	67	68	77	31	22	114	94	71	102	54	89	19	44	31	60	12	57	23	15
35	81	52	54	56	68	54	88	69	75	32	61	50	62	56	70	49	55	101	39	120	94	54	63	44	48	82	63	39	40	38	39	78	69	57	60	68	80	40	74	45	54	17	64	38	36	12	13	26	23
88	109	56	90	69	67	66	99	106	112	62	83	82	64	71	136	57	52	67	80	92	90	83	43	60	112	50	47	75	49	57	52	41	63	83	111	122	115	71	87	72	75	20	46	23	28	58	39	33	18
113	103	87	63	64	81	84	108	109	127	84	75	80	96	49	92	74	82	63	84	89	104	82	92	95	118	35	80	65	95	69	72	55	66	80	104	92	85	50	109	83	65	22	18	17	34	30	21	35	34
58	101	64	79	84	96	55	70	61	92	41	92	60	59	43	76	53	58	45	71	49	51	90	71	65	58	13	55	61	50	44	52	30	61	58	58	70	50	79	88	58	89	68	101	34	75	66	65	31	69
48	103	71	59	79	82	21	28	97	96	81	99	78	60	57	54	60	80	48	98	46	38	80	57	57	27	46	44	55	55	47	53	40	35	52	65	115	113	94	44	74	78	72	46	16	68	58	23	38	9
61	147	56	32	66	54	72	65	130	119	71	116	80	131	60	92	60	32	56	56	32	38	66	49	29	31	62	45	51	40	37	32	36	51	28	24	83	64	63	54	55	57	40	45	19	38	38	30	21	31
104	119	88	88	76	69	88	81	107	120	70	51	96	75	101	62	104	92	52	42	63	65	87	75	71	99	92	42	92	89	54	51	46	79	56	78	95	125	133	129	82	98	102	58	82	48	64	96	74	30
87	67	92	90	106	98	33	65	87	88	102	112	107	101	63	52	44	65	65	98	28	78	90	88	65	38	102	61	62	31	58	89	73	68	59	84	61	74	58	75	73	91	52	72	31	44	71	89	20	20
82	118	56	75	95	69	70	32	98	112	105	127	88	114	80	57	58	106	38	87	79	78	85	100	70	89	63	90	55	94	89	95	82	78	57	81	117	121	91	106	62	75	71	118	43	63	69	77	34	17
31	73	45	61	28	47	45	53	32	61	49	48	79	57	89	63	36	31	62	53	75	81	44	45	19	52	58	55	42	43	58	59	82	59	78	101	108	91	87	93	101	87	81	42	84	86	121	62	80	65
30	33	18	29	14	42	39	43	56	50	28	32	29	31	48	46	54	52	77	59	81	67	51	54	68	52	63	58	50	69	86	93	72	83	83	93	77	100	66	110	74	59	77	71	50	94	22	27	59	48
39	53	57	53	85	77	34	38	51	45	51	77	81	100	110	115	92	89	72	109	82	76	59	80	72	94	96	101	30	80	46	75	61	90	74	87	108	114	60	56	77	64	121	124	90	123	85	50	78	65
73	52	67	82	61	51	49	46	86	100	68	73	43	56	44	61	94	65	84	70	104	71	49	82	78	43	37	67	91	49	98	97	49	70	65	58	83	81	43	68	50	69	80	71	87	96	27	26	59	26
73	84	50	61	59	61	73	68	95	74	42	54	60	60	45	61	59	66	61	57	98	88	48	60	46	71	63	53	109	74	70	84	45	51	23	36	69	82	28	86	72	76	53	70	66	87	89	94	49	34
61	88	64	76	82	72	57	56	85	94	76	72	70	67	31	36	45	58	28	58	42	61	56	63	43	39	51	55	50	44	39	40	15	81	32	56	80	95	74	70	82	96	67	45	58	59	91	110	103	75
93	122	78	69	91	70	56	76	109	106	98	75	101	90	104	50	67	76	58	66	52	57	73	55	67	56	72	64	80	35	77	91	65	63	90	94	29	67	82	45	69	65	85	75	61	79	78	88	77	71
33	56	87	73	100	101	47	63	71	68	52	70	78	84	40	36	77	66	43	51	62	57	83	54	35	58	49	52	66	64	68	70	53	56	51	45	65	64	40	52	64	92	59	89	44	24	81	123	100	44
55	100	76	53	76	70	24	90	77	72	79	72	80	87	102	90	43	67	64	94	57	89	63	67	37	53	81	79	33	49	33	49	45	25	60	42	69	98	88	80	90	68	95	58	78	76	119	90	46	46
59	74	93	70	65	56	35	31	78	80	115	101	99	124	32	62	82	89	135	87	60	42	96	81	63	51	72	54	77	65	68	47	40	45	112	27	76	92	60	68	73	94	75	122	31	62	75	37	50	30
43	16	90	105	87	36	39	34	55	42	77	75	70	57	82	68	98	136	78	96	99	107	71	91	49	34	125	109	103	85	72	87	57	49	95	42	46	63	45	43	76	70	68	43	46	53	98	109	83	70
70	108	84	108	64	69	107	108	107	123	90	84	86	83	75	125	63	91	69	88	114	98	109	118	125	113	60	66	82	91	52	64	52	79	89	135	56	97	91	69	26	29	25	105	66	63	23	31	27	16
67	106	113	134	108	132	64	62	95	91	46	61	104	106	93	92	90	83	48	111	65	68	97	82	94	78	92	112	81	81	88	55	96	101	67	98	48	74	72	82	113	109	19	96	46	69	78	108	103	62
77	56	75	61	89	84	30	55	77	84	45	58	106	97	97	74	33	78	62	66	55	80	82	92	54	74	28	58	48	77	46	75	47	81	49	63	59	58	72	89	56	57	51	90	27	22	61	53	20	51
104	80	69	70	68	57	68	113	80	88	84	70	43	34	104	94	66	41	72	58	73	65	119	90	79	87	88	63	51	33	67	38	46	20	53	67	73	82	67	103	39	27	66	21	48	89	59	54	16	59
48	26	30	39	52	50	27	121	98	41	82	58	84	84	44	91	53	96	60	63	54	82	23	129	52	86	82	89	51	119	42	57	108	118	69	80	105	68	108	103	83	107	93	71	129	110	27	56	15	17
45	44	56	50	54	59	52	64	57	62	47	55	76	64	37	44	79	55	55	48	69	50	74	47	58	68	50	49	70	55	71	46	96	82	91	92	104	82	67	85	37	44	135	91	28	68	57	31	34	15
67	45	99	101	81	111	116	97	82	107	81	68	95	106	107	92	69	63	53	121	69	85	99	64	104	106	97	61	68	54	60	95	79	80	79	127	62	67	110	92	82	74	86	70	67	70	78	67	42	35
56	135	21	21	33	57	117	113	110	130	56	50	39	28	20	30	52	129	70	66	97	75	51	34	74	22	24	33	55	112	31	125	25	87	60	54	22	100	109	146	37	44	82	32	111	57	43	39	2	4
53	62	51	87	90	118	20	15	41	43	100	105	86	110	82	61	64	69	86	77	69	90	43	52	45	53	74	96	58	76	59	77	87	93	63	62	80	84	75	67	125	107	72	92	71	89	34	57	113	98
97	68	81	68	91	80	48	29	101	52	117	95	37	52	70	68	90	61	57	80	59	77	94	77	96	58	14	93	61	41	31	57	67	15	67	117	58	53	104	7	64	67	46	47	15	16	67	34	69	58
86	109	88	91	85	86	128	131	75	80	89	83	84	85	108	61	81	84	79	75	100	82	93	89	46	46	88	80	72	80	100	97	82	30	76	109	104	139	42	36	84	67	86	82	69	74	67	82	65	22
48	91	108	42	122	120	63	67	58	57	107	82	127	114	79	75	43	43	36	63	55	64	109	69	34	56	55	59	66	57	40	88	67	123	91	53	52	99	65	62	89	111	67	78	37	23	35	36	110	109
126	144	61	130	49	74	24	98	31	102	123	162	33	50	112	110	80	157	69	85	136	121	108	132	63	107	49	25	86	131	133	145	95	122	134	161	130	163	141	124	27	32	81	149	12	60	8	7	25	9
62	38	71	78	44	41	88	86	127	111	91	88	21	49	49	53	102	98	44	43	72	70	113	73	69	102	25	36	63	91	78	106	86	97	81	64	93	115	103	115	51	54	10	11	23	19	14	25	3	1
42	43	96	106	112	94	49	64	110	108	107	93	119	98	88	70	96	86	106	99	70	54	67	75	105	89	13	21	22	53	86	24	89	85	98	67	44	71	26	57	99	92	87	79	52	60	109	106	41	61
75	78	75	68	97	104	57	63	82	88	91	91	84	60	86	86	106	93	98	101	61	73	100	74	112	98	77	82	85	70	73	65	81	74	88	46	96	101	94	79	82	78	105	102	75	73	71	102	87	39
83	93	73	60	67	74	40	83	50	49	90	86	51	45	47	64	79	90	49	77	58	66	66	52	33	89	76	63	91	58	55	63	75	68	65	59	71	41	60	61	74	77	72	40	51	51	66	65	41	39
53	65	38	65	66	72	52	50	105	79	30	29	38	39	58	64	55	57	69	50	64	57	68	65	70	71	66	75	59	63	68	63	61	66	54	63	35	14	54	51	51	40	63	66	8	1	23	35	19	3
99	61	86	102	96	89	73	77	99	96	82	88	108	100	75	56	84	95	96	97	79	86	93	75	112	82	97	88	90	16	68	88	49	47	60	53	39	48	80	33	50	71	61	60	78	76	57	75	30	46
78	99	38	40	66	71	38	46	45	64	55	90	96	95	38	61	54	86	39	98	53	96	82	112	37	73	49	59	48	109	93	83	118	116	104	88	110	120	110	69	90	98	97	84	45	66	29	41	86	92
72	69	92	74	88	90	54	74	90	89	71	63	72	93	72	93	78	45	53	80	41	68	103	81	61	77	50	47	72	47	70	77	72	70	97	67	92	101	52	57	70	72	72	52	42	49	59	60	51	66
40	77	34	50	68	77	34	53	42	50	69	50	71	94	75	55	52	67	82	79	70	67	64	90	71	58	122	91	37	79	75	84	45	78	54	74	50	82	40	32	70	71	61	109	49	55	55	67	77	63
63	60	44	73	54	76	56	76	59	87	51	101	83	105	59	92	73	36	55	71	64	64	54	29	56	93	74	86	67	96	72	71	68	80	59	50	36	86	53	90	57	92	40	51	62	32	84	116	12	24
86	98	85	46	95	70	38	61	86	91	110	90	69	80	27	38	98	59	73	26	79	69	78	70	82	75	24	26	89	75	103	96	95	90	96	114	112	91	101	78	95	110	101	92	27	20	18	36	65	76
47	34	80	40	89	98	51	99	104	92	95	98	111	105	86	89	54	74	77	69	60	69	59	73	47	41	71	56	94	91	47	72	79	16	49	71	50	83	63	107	89	90	30	17	15	56	39	85	39	37
64	71	70	58	59	53	95	121	104	83	70	96	44	48	81	54	78	73	69	46	101	76	68	65	89	97	73	42	46	63	64	102	67	65	42	75	46	76	56	112	56	47	40	62	49	38	64	49	8	54
24	30	50	56	69	75	18	71	63	63	76	88	88	88	65	80	62	41	29	48	44	33	68	62	52	43	60	49	55	61	24	133	75	121	56	50	26	119	52	93	85	47	32	67	18	35	66	82	58	66
83	92	46	48	50	32	55	81	143	101	41	25	42	53	75	99	59	45	54	32	61	42	43	70	55	43	48	68	53	22	36	25	69	73	64	63	89	91	122	58	69	27	40	21	52	30	39	16	47	49
38	124	52	67	75	67	49	106	109	117	65	122	73	89	68	89	53	84	89	134	38	98	75	70	40	74	90	85	26	92	22	59	48	64	56	90	81	123	53	94	78	114	57	57	27	82	53	54	34	26
105	117	112	108	119	119	95	98	106	114	97	110	124	110	111	136	60	90	57	110	97	72	139	90	118	123	74	84	56	113	81	77	19	55	49	33	62	64	48	76	57	30	16	88	31	53	15	57	12	17
63	68	62	66	50	58	57	42	61	59	54	54	73	88	60	58	60	70	59	52	68	73	51	62	67	88	85	61	70	79	63	93	89	78	62	83	95	96	104	94	45	93	89	71	66	99	55	59	41	25
60	68	69	44	67	51	92	64	101	112	70	70	73	46	50	68	81	83	49	47	50	55	44	61	122	62	49	24	85	69	53	65	55	67	52	88	87	107	88	98	53	33	56	56	56	53	36	33	34	50
83	116	64	76	73	71	101	89	120	80	86	73	85	76	102	122	107	126	59	112	110	91	70	90	133	63	50	73	74	116	73	94	61	77	68	74	32	85	64	80	84	74	48	71	68	104	38	39	28	31
176	146	152	87	147	75	136	163	141	159	64	64	90	52	122	55	122	23	159	75	131	81	167	116	156	164	15	24	56	80	27	107	40	65	17	16	65	19	149	38	111	70	97	44	12	21	13	19	13	17
49	63	60	64	88	107	58	43	93	99	86	72	88	72	41	68	42	81	94	100	69	77	95	110	111	97	104	90	69	70	41	85	37	81	79	116	58	57	60	40	53	53	82	108	19	56	49	35	48	26
90	128	79	94	55	94	40	55	64	83	76	98	87	117	72	122	86	88	64	73	72	99	88	111	61	75	98	45	46	110	64	112	59	70	98	84	44	93	101	81	56	56	76	84	42	38	54	49	39	39
61	72	55	54	41	44	58	20	55	59	77	86	75	84	55	39	51	51	61	49	71	46	62	46	55	53	71	71	67	53	48	52	62	51	60	63	71	58	70	60	81	86	62	51	66	48	81	91	47	51
35	25	49	54	45	52	69	100	44	57	44	51	54	84	45	56	44	42	68	72	60	97	55	50	68	106	68	97	40	60	55	112	43	115	66	148	22	25	38	59	41	36	28	23	16	16	57	43	33	44
68	89	73	55	83	64	51	75	117	99	60	83	71	101	54	83	69	53	66	63	85	96	64	28	41	84	45	32	54	97	75	97	63	98	71	38	96	76	80	99	60	83	64	39	52	39	54	65	20	73
43	74	61	75	37	34	49	50	136	133	34	77	49	50	47	56	43	46	44	43	61	57	57	69	66	63	71	67	106	131	29	48	41	49	38	110	126	141	78	97	64	48	34	31	14	7	71	65	13	28
50	97	51	76	52	83	67	41	88	67	57	95	81	100	47	33	51	92	111	65	90	68	28	62	79	105	65	108	42	76	65	99	62	44	32	28	64	37	33	22	112	107	59	74	22	52	62	59	79	17
43	41	35	42	19	43	38	40	30	28	36	34	24	34	47	36	39	25	16	51	47	37	43	16	36	44	5	18	32	81	26	28	70	96	38	99	106	110	10	38	17	15	7	4	2	3	4	4	9	5
96	115	79	54	55	57	59	49	64	112	99	91	66	60	104	106	55	55	53	37	113	37	87	22	66	41	35	60	73	61	62	57	55	72	76	69	88	92	78	72	56	66	53	43	105	107	21	56	108	74
86	107	44	55	80	85	46	73	70	84	86	79	46	29	78	73	69	90	71	74	50	57	43	58	47	42	38	54	48	61	42	51	59	35	58	63	107	84	51	40	45	58	55	64	15	16	30	39	60	61
90	61	77	84	35	36	32	29	77	87	60	65	31	31	61	36	94	78	61	44	66	30	57	90	93	96	71	73	93	82	67	30	68	42	49	31	115	108	94	90	44	67	61	33	24	31	26	54	74	53
38	47	37	34	13	14	41	40	39	42	66	80	74	64	57	66	32	70	62	38	68	51	67	65	41	16	30	50	38	93	62	29	47	46	34	53	67	66	41	91	109	97	82	34	103	55	49	42	57	71
40	64	56	60	48	34	23	83	98	96	42	31	65	75	50	88	41	43	39	83	49	69	50	55	50	57	59	46	47	23	49	49	49	34	45	82	52	111	41	58	70	76	51	53	49	63	57	36	48	50
62	83	40	74	65	86	44	73	108	111	53	71	57	67	60	68	48	49	49	74	50	58	76	66	70	59	58	45	47	45	55	48	60	58	69	72	44	95	67	100	79	40	66	60	58	59	55	62	59	59
44	96	60	83	70	69	93	94	110	106	53	63	62	89	97	70	51	63	35	89	45	82	57	66	47	45	44	94	40	57	28	55	42	55	62	80	36	91	53	55	55	76	83	123	55	90	25	26	87	67
87	86	67	101	64	113	87	61	86	110	101	117	95	118	68	53	75	79	64	53	47	61	85	63	84	120	97	95	37	50	46	82	94	84	85	73	86	97	61	44	72	100	98	92	47	84	75	78	62	38
113	129	74	60	59	92	47	48	127	102	124	136	80	103	96	82	107	74	75	72	116	92	99	100	69	88	12	42	101	72	98	100	48	51	73	124	169	118	130	101	69	72	77	94	36	146	18	59	9	4
26	63	91	80	96	93	33	19	45	67	43	25	32	82	73	69	44	68	77	82	55	74	86	54	70	48	83	61	40	48	57	65	61	62	51	57	43	44	46	110	65	35	112	86	85	90	57	61	9	15
62	62	45	87	54	62	29	72	132	130	64	79	53	61	22	50	74	35	45	34	36	51	81	68	73	97	33	50	79	100	32	71	43	28	27	34	75	62	37	105	56	82	37	66	34	50	36	27	137	80
86	58	105	112	94	97	62	109	60	62	104	119	109	123	51	37	98	39	44	63	101	53	108	75	34	100	10	30	58	23	45	69	66	51	37	42	35	34	115	52	28	47	51	61	52	94	78	18	33	40
112	78	62	58	40	39	44	17	45	60	59	62	32	37	111	71	72	57	93	53	142	61	44	29	25	75	121	91	46	76	73	44	63	82	140	67	21	41	57	64	67	79	110	80	131	45	68	62	7	6
39	70	50	25	47	63	35	45	89	75	42	42	78	74	49	52	47	47	37	72	37	54	48	48	43	38	34	59	39	48	45	74	88	66	74	79	53	61	71	94	63	45	87	71	54	73	92	133	62	30
49	37	54	34	61	46	31	31	52	46	54	66	67	77	53	45	71	62	60	66	60	85	53	72	50	42	62	100	52	69	29	55	56	57	52	61	58	65	51	56	79	80	58	59	65	50	77	94	42	41
142	176	46	74	66	19	138	149	102	114	82	110	75	36	97	73	72	96	111	65	94	109	67	95	69	145	55	104	73	110	49	68	42	74	68	30	109	105	89	97	54	44	14	30	32	9	11	31	10	9
65	69	76	50	125	116	55	53	91	92	49	62	110	106	113	85	58	68	142	131	133	129	69	38	31	63	138	141	63	68	45	36	64	70	87	48	51	99	34	81	92	58	36	39	86	90	26	66	49	44
70	53	33	70	102	76	19	44	44	51	101	133	119	84	45	78	56	65	45	53	23	73	78	63	41	78	39	27	47	97	48	72	91	84	84	66	117	138	107	97	119	49	120	107	19	38	37	23	24	8
64	40	86	92	78	103	52	26	65	77	120	108	70	95	44	34	106	91	51	55	62	42	88	36	30	32	36	53	54	132	37	53	20	13	30	40	62	47	75	34	98	83	64	100	52	26	88	98	28	27
36	54	62	67	63	52	46	34	48	33	34	43	63	70	86	61	49	53	80	88	69	94	44	44	54	51	69	87	32	75	51	66	42	115	78	97	70	92	94	123	74	79	75	55	55	85	48	92	60	71
59	64	70	60	99	87	33	67	48	54	74	67	67	57	47	73	71	63	54	71	81	83	59	81	54	71	57	83	60	54	79	72	93	63	82	115	95	83	106	99	48	46	119	85	99	70	55	56	21	37
79	87	82	80	55	91	50	64	33	70	90	73	77	86	75	50	81	77	76	95	116	101	77	88	72	87	88	79	54	73	58	83	36	44	71	86	43	103	99	104	86	76	64	87	26	60	97	82	54	39
41	57	37	52	38	51	53	53	91	73	43	52	43	49	43	54	51	51	39	51	46	44	56	53	47	50	58	48	26	36	31	31	37	54	34	63	84	70	59	31	75	79	85	89	101	91	5	64	85	93
87	74	118	116	70	104	22	27	73	42	122	131	115	137	67	101	73	68	73	40	49	19	108	82	34	44	68	64	103	21	42	52	95	107	59	122	108	111	70	49	123	119	131	87	103	90	49	68	101	45
60	80	40	41	31	66	50	80	82	83	61	72	39	52	45	79	78	73	58	60	86	87	45	76	57	73	61	114	93	75	104	124	23	82	40	105	86	101	53	104	26	50	39	62	49	58	4	25	34	27
47	108	65	51	67	77	73	103	57	84	66	79	55	73	115	107	67	76	96	97	101	94	84	86	61	60	41	63	82	113	63	43	110	115	99	128	108	111	120	125	58	57	51	58	37	67	64	61	28	20
78	96	94	93	77	94	67	102	64	83	73	99	88	92	41	96	27	76	74	94	36	58	89	70	78	85	92	73	44	62	58	70	20	38	30	27	70	52	74	55	76	91	89	75	55	82	39	26	56	40
0	0	0	0	0	0	0	0	0	0	0	0	0	0	0	0	0	75	0	0	0	16	0	0	0	0	0	0	0	73	0	85	0	125	0	73	0	68	0	59	0	0	38	62	56	76	0	0	88	89
44	88	32	50	47	39	20	47	118	117	60	65	31	48	35	33	59	48	36	62	59	48	42	57	39	36	41	17	40	51	45	36	64	64	63	52	43	93	76	49	55	83	23	22	87	33	24	36	48	28
37	52	82	95	79	56	100	72	101	105	54	52	60	66	43	68	91	71	62	37	36	38	90	51	105	98	55	81	68	42	35	32	54	50	61	35	56	44	37	44	58	70	61	42	22	38	60	55	59	22
53	74	90	110	78	88	127	141	109	109	101	93	86	86	106	97	95	95	105	111	96	101	104	108	128	132	55	69	83	94	67	100	60	56	75	71	91	81	55	113	91	90	44	84	55	34	34	49	43	43
55	60	67	60	85	66	18	37	84	92	81	86	72	57	46	35	71	52	53	61	56	46	55	37	58	47	62	75	76	57	70	36	71	57	68	48	74	40	54	75	101	75	82	49	63	90	90	61	35	57
46	69	61	90	80	70	39	57	112	124	53	75	87	123	51	64	68	89	53	59	83	85	78	83	81	87	67	86	73	85	91	92	67	112	94	97	100	103	76	87	72	90	28	84	61	70	30	33	33	56
42	45	79	42	60	64	30	62	89	99	66	42	88	67	67	54	84	40	61	27	51	40	73	30	62	58	72	32	26	79	79	54	36	65	63	66	42	74	58	88	66	71	83	74	66	50	43	66	44	30
60	53	65	72	66	76	39	37	94	93	83	94	71	74	66	84	90	81	39	53	74	91	54	56	68	54	81	46	57	83	56	86	57	90	81	66	58	82	45	78	65	61	84	29	58	32	80	93	32	13
63	114	70	72	68	62	42	84	131	98	86	90	60	65	57	41	90	73	82	30	36	52	71	51	68	72	48	23	71	54	59	74	53	69	56	91	78	94	46	103	73	70	66	40	51	68	61	44	56	25
61	89	70	78	83	93	23	52	70	103	98	95	90	80	62	74	57	54	71	81	47	46	86	74	52	46	69	66	54	64	33	37	71	91	81	69	72	106	83	118	63	65	97	81	73	82	55	64	78	53
68	79	49	60	39	65	54	44	89	79	57	56	59	49	41	65	49	63	70	47	48	58	60	75	34	33	77	81	44	32	34	60	16	31	47	12	61	49	67	46	24	21	63	45	64	101	88	89	46	40
55	136	82	75	77	82	123	146	108	143	84	31	60	91	40	46	68	38	78	38	39	27	75	63	38	28	28	33	33	31	41	93	60	28	27	75	35	80	53	27	42	57	79	75	52	53	37	33	41	33
84	77	70	60	74	83	65	65	66	70	104	93	88	92	61	62	80	59	36	43	91	88	72	74	59	50	40	51	81	60	100	93	70	102	54	74	90	82	86	84	95	100	95	57	77	48	78	103	67	28
89	66	65	45	37	29	24	38	75	29	94	70	54	66	19	18	99	82	58	50	67	74	45	55	112	123	52	43	101	86	67	99	103	98	106	96	99	105	123	55	75	63	123	115	74	104	51	90	73	63
43	46	82	63	117	88	43	39	61	77	52	72	127	141	49	39	57	69	22	34	40	44	46	38	71	73	52	56	60	66	56	58	70	57	52	59	57	40	61	66	119	108	63	46	53	60	82	115	49	59
54	64	72	94	42	71	53	49	31	62	64	64	77	63	72	48	86	70	74	71	66	65	98	64	90	76	77	61	65	56	71	48	48	36	77	56	40	30	68	55	77	80	74	70	74	55	79	99	75	62
97	101	92	102	96	107	48	48	93	104	102	102	89	88	105	84	98	66	101	97	43	60	107	95	94	79	103	98	80	62	48	37	60	84	71	69	90	86	80	84	79	88	91	84	40	59	58	72	75	1
89	155	125	91	120	131	39	63	72	96	157	173	108	110	102	84	90	119	112	97	102	87	135	81	107	70	65	32	90	42	60	70	108	20	66	64	101	74	74	115	88	87	59	85	49	105	72	85	83	52
91	67	94	31	78	45	58	122	76	86	106	103	78	59	39	73	84	43	22	36	51	72	46	41	35	75	9	22	51	135	38	109	17	10	71	34	97	79	62	115	60	73	60	27	21	29	38	31	60	30
81	144	128	106	125	127	43	38	40	53	128	135	120	126	87	93	101	111	95	81	82	81	132	85	91	112	99	73	76	83	86	80	121	129	53	37	93	60	126	92	98	98	114	101	63	52	93	69	106	112
72	120	42	47	34	33	64	112	101	80	34	45	33	64	66	49	81	61	42	46	77	75	47	45	51	81	41	47	46	85	52	35	31	53	80	102	67	115	85	110	34	40	46	33	15	41	42	47	16	45
80	147	68	54	62	72	104	136	122	114	64	72	71	87	92	72	41	106	51	90	31	53	62	82	62	94	40	70	52	107	51	45	58	116	43	54	116	111	85	74	36	49	54	51	38	60	23	11	73	30
83	106	50	48	51	39	53	60	88	98	64	49	55	66	53	51	75	86	52	70	71	75	51	66	55	73	70	72	64	87	38	54	55	74	57	69	50	42	44	87	39	66	68	81	43	72	77	67	61	44
105	107	86	108	106	115	60	42	29	39	105	139	96	102	72	74	103	144	89	92	104	80	106	91	104	136	91	84	118	103	78	82	61	89	118	114	90	110	45	40	71	99	80	65	75	64	48	69	54	20
52	38	40	39	36	20	66	72	56	51	39	32	28	48	39	24	59	50	42	20	23	25	39	38	76	68	54	39	68	68	55	29	83	59	97	87	92	116	70	27	63	58	94	75	64	62	94	86	113	88
56	123	51	73	74	85	81	116	96	97	89	124	74	87	93	97	58	92	76	110	70	122	67	62	33	99	47	30	52	90	49	94	47	95	51	82	67	116	114	104	64	79	95	61	50	37	3	66	61	56
56	69	80	47	72	71	50	56	35	55	76	74	80	68	51	81	58	99	57	66	81	81	65	53	71	88	58	61	67	104	68	74	44	42	58	65	43	41	64	67	73	73	54	56	54	27	37	39	35	19
25	56	40	52	59	42	15	100	84	115	46	53	65	87	13	112	31	106	29	48	46	85	50	45	43	91	31	54	45	76	22	79	54	51	21	29	11	58	59	108	68	33	32	45	36	4	113	99	22	31
79	118	66	58	103	96	25	105	117	121	72	88	97	82	91	68	63	40	62	74	48	74	86	52	66	70	52	53	52	56	41	68	61	49	67	78	95	114	94	85	84	73	80	57	59	48	82	79	10	57
43	104	48	67	86	112	31	26	73	57	95	103	75	104	46	62	94	76	49	59	44	72	76	67	65	56	37	55	89	93	69	60	93	104	41	100	84	113	105	110	65	63	106	84	75	95	84	92	71	59
47	48	74	47	73	33	10	43	84	57	88	121	110	87	33	72	43	72	22	39	20	72	84	59	9	75	48	42	56	66	4	63	55	72	86	41	102	90	41	64	70	58	36	56	43	44	60	73	42	9
34	43	69	37	78	71	26	41	81	61	68	40	53	59	45	37	72	85	61	57	73	68	54	45	77	43	83	73	59	38	56	51	56	43	74	49	78	52	62	55	66	78	72	60	67	62	32	59	78	92
105	93	128	109	82	92	80	95	76	74	128	127	92	102	118	122	103	102	88	111	118	107	127	126	97	93	99	92	98	84	86	96	74	103	86	138	49	76	93	107	95	91	82	65	37	43	83	88	36	25
29	44	46	54	40	43	39	27	50	59	39	37	74	41	47	52	46	38	76	59	56	56	63	64	39	45	38	29	25	23	29	23	24	69	74	48	71	62	70	61	71	66	12	41	58	13	75	93	24	10
84	71	68	92	53	89	45	61	73	42	80	101	101	64	87	70	71	76	125	96	79	107	109	58	63	94	100	107	129	94	74	114	100	97	92	86	54	81	93	73	60	62	56	79	65	97	99	73	37	87
41	63	51	62	56	55	19	80	98	116	72	55	39	53	82	69	40	44	57	58	55	71	84	65	48	56	34	41	53	75	47	103	34	21	47	46	55	51	60	71	32	37	36	41	51	42	38	38	65	27
116	119	71	60	53	63	131	81	111	104	77	82	69	98	76	61	89	66	76	75	81	63	81	90	109	50	72	85	78	71	106	62	51	40	37	65	53	67	41	45	58	65	60	63	54	58	55	66	55	24
41	77	57	79	89	103	47	48	97	69	83	101	109	102	90	77	73	88	78	102	61	78	80	80	37	77	45	57	63	58	48	54	39	40	68	53	40	82	41	59	37	57	63	71	48	64	29	60	49	58
52	78	50	99	59	88	64	80	49	52	72	112	74	92	36	55	43	95	87	104	65	84	94	92	24	120	76	111	36	70	47	67	13	90	46	94	19	64	15	51	61	67	37	80	88	110	48	67	68	79
78	141	63	20	77	49	39	73	89	56	45	58	57	42	59	50	81	53	80	88	107	75	67	61	46	108	75	70	34	59	31	24	73	95	43	104	56	90	57	83	47	70	83	48	27	45	61	77	17	15
46	94	81	75	82	114	47	84	92	84	74	112	127	109	68	72	61	53	70	115	93	89	76	72	54	69	57	43	63	74	70	43	58	110	69	136	49	112	69	104	84	70	62	23	69	47	84	103	47	43
43	104	70	49	47	21	31	132	84	117	56	40	50	38	43	67	39	55	44	25	58	78	68	90	55	61	62	43	32	80	48	35	43	52	53	106	40	59	54	33	59	58	53	54	84	27	57	51	58	31
36	60	76	54	58	73	69	54	71	51	44	88	60	37	39	56	95	85	67	65	75	57	87	85	56	67	96	96	64	75	54	59	69	92	67	77	59	58	39	64	53	50	107	78	82	110	89	121	81	61
32	43	21	46	15	25	20	31	34	29	37	48	31	39	33	66	35	44	48	45	42	78	34	46	39	44	58	62	64	48	31	75	16	51	38	77	24	71	88	79	78	91	89	40	90	99	44	32	58	82
111	142	83	77	71	75	100	129	113	91	101	91	78	67	116	98	89	95	88	86	113	92	85	109	108	63	82	82	63	72	35	31	70	71	64	62	82	96	134	138	43	59	86	96	45	66	4	7	5	5
25	44	68	50	111	68	27	21	63	53	68	32	91	128	113	29	23	42	80	47	32	39	70	12	30	40	47	15	31	42	33	40	24	49	43	32	64	135	34	114	74	82	95	48	81	95	70	79	90	101
41	45	74	67	70	81	120	64	80	96	66	53	62	88	42	31	55	43	79	50	43	47	82	63	53	42	58	68	42	37	55	78	82	69	92	82	76	85	63	44	86	72	72	78	41	62	80	4	96	62
76	68	99	68	67	88	30	47	65	79	57	57	92	89	45	47	30	26	89	42	38	49	83	78	26	39	32	91	72	13	29	21	18	57	73	56	26	23	91	65	64	72	64	70	48	82	53	6	56	52
60	59	67	82	84	93	10	30	65	60	75	90	108	72	59	38	54	62	81	92	81	96	70	62	38	71	84	100	46	30	59	52	66	86	57	79	110	107	85	71	76	72	72	71	72	51	69	65	52	58
158	134	63	86	61	95	110	108	129	115	100	152	81	92	53	47	107	99	28	56	82	76	92	74	69	95	38	39	112	63	25	26	107	63	35	44	150	135	154	18	47	86	83	48	15	36	4	9	24	8
94	124	100	66	112	104	106	119	79	78	99	98	114	121	66	65	97	91	58	54	55	61	60	55	91	73	82	100	27	76	64	78	102	117	89	109	61	86	86	99	74	76	100	93	114	88	48	75	67	62
95	87	95	88	105	95	79	71	66	69	93	94	70	74	95	82	94	86	61	51	86	63	92	77	67	79	93	95	46	63	78	55	78	70	68	80	68	82	53	59	70	86	55	60	77	76	112	103	30	54
72	136	67	68	65	76	80	60	112	127	95	94	52	57	57	116	63	64	60	51	44	41	91	82	78	93	35	49	72	40	35	51	63	102	55	111	97	133	142	100	42	51	45	26	30	17	32	30	48	27
69	136	80	64	84	85	88	77	92	109	96	83	86	104	65	77	80	100	65	76	85	95	74	97	64	70	80	84	52	74	59	81	52	103	65	95	104	116	100	113	57	40	74	73	34	42	39	54	34	32
72	104	56	90	43	88	109	89	135	127	85	98	80	78	64	113	55	103	42	69	84	43	63	94	54	93	37	14	121	87	80	93	27	70	45	43	151	54	67	61	62	107	63	58	30	34	12	72	11	6
97	107	88	58	88	74	96	97	116	131	84	68	80	87	73	82	96	62	34	48	62	62	85	45	95	50	28	34	108	127	65	93	100	83	87	72	97	122	84	48	53	69	82	72	70	63	43	65	51	59
109	101	105	96	103	106	82	115	101	104	114	106	85	85	97	111	95	112	84	89	29	82	84	94	105	115	109	96	73	47	29	27	54	54	71	79	92	111	76	78	75	67	50	98	53	31	99	104	52	58
84	105	77	88	93	104	45	62	114	112	92	92	81	101	75	88	65	96	71	89	52	83	67	70	81	56	84	92	48	59	40	17	41	19	57	63	67	57	45	61	67	56	88	96	40	29	91	92	55	44
93	87	63	78	95	80	81	56	92	105	92	67	86	89	77	82	98	77	73	83	54	81	86	87	51	49	69	73	79	79	54	83	44	63	77	71	54	84	73	66	85	74	100	96	61	63	80	73	51	44
40	65	75	51	91	55	41	62	54	60	91	60	91	77	62	51	77	43	56	34	48	45	89	47	64	86	66	43	54	67	53	48	60	58	78	78	57	81	51	79	118	113	70	87	49	88	83	94	90	55
41	67	69	68	103	120	37	35	60	76	87	96	65	53	38	84	61	110	56	114	57	103	83	123	48	83	104	111	61	79	59	75	50	53	60	55	58	75	43	45	27	57	58	97	53	53	24	58	64	59
56	50	49	49	85	78	51	77	79	52	54	62	91	110	38	50	63	67	57	59	38	32	61	42	56	132	56	60	64	72	64	77	25	68	38	35	62	61	85	75	85	93	57	39	35	16	84	68	68	39
42	55	61	46	47	44	168	164	143	136	48	45	46	58	125	157	152	47	48	35	60	101	89	45	88	50	73	39	46	105	42	62	34	44	110	145	133	50	91	108	68	44	50	21	33	63	39	41	38	11
76	69	100	95	91	92	76	87	79	91	110	106	108	112	93	70	77	83	92	93	87	90	90	75	65	78	73	59	45	79	60	80	69	64	98	79	60	79	79	73	118	108	60	40	92	45	35	72	14	40
85	112	72	58	72	107	83	71	127	140	93	97	81	89	52	50	90	104	81	78	104	95	73	80	84	84	76	60	93	116	47	72	104	95	77	91	108	117	83	81	46	48	69	85	32	62	31	31	31	22
98	100	115	104	117	109	39	66	100	104	90	97	97	98	76	83	81	52	94	63	57	21	108	109	83	67	97	76	50	35	55	39	61	104	47	104	122	108	110	84	84	90	104	102	12	22	56	72	19	3
51	81	33	48	34	73	59	70	124	85	53	105	22	30	38	65	82	108	73	54	55	54	48	89	60	93	82	47	38	111	28	84	38	86	46	43	49	106	110	88	20	23	11	46	30	27	73	74	39	14
33	64	69	52	36	34	33	26	70	67	54	81	58	63	78	71	78	33	60	56	88	67	72	81	43	29	78	89	71	60	74	77	73	61	71	79	45	72	95	76	73	94	77	52	35	42	37	78	25	33
31	29	34	95	30	25	54	64	83	96	37	42	38	34	51	95	58	52	50	87	94	132	54	120	74	78	80	105	53	41	56	59	27	61	46	36	36	31	35	68	54	83	63	78	84	111	46	40	79	106
57	82	56	68	79	51	71	99	95	83	72	61	56	52	92	72	54	71	51	58	64	68	100	67	87	90	56	106	68	56	62	59	20	46	66	45	73	52	42	37	28	53	83	47	54	97	85	88	23	9
101	109	75	69	62	101	89	88	101	80	89	103	80	60	82	95	95	125	98	96	74	113	67	111	102	137	36	46	88	110	60	97	17	59	38	83	79	146	48	135	69	83	91	101	68	112	88	54	51	26
102	125	90	96	80	127	85	88	71	63	115	113	80	95	54	98	94	98	82	118	63	102	106	123	85	98	78	103	91	78	50	78	69	58	74	89	72	57	71	84	84	101	111	94	75	119	99	111	46	32
45	53	82	78	98	109	90	103	80	97	87	111	96	102	106	97	37	97	37	53	50	62	99	85	116	105	44	37	20	94	60	53	30	56	54	61	84	103	94	133	87	97	101	75	17	19	87	84	27	57
78	82	39	55	36	41	39	48	119	115	75	86	51	45	31	49	42	57	81	58	35	47	70	59	57	70	5	37	59	28	20	13	46	90	62	102	81	133	51	113	53	93	58	78	26	23	29	59	23	31
44	35	38	41	61	33	38	46	62	79	34	29	50	65	70	32	66	82	60	50	66	70	54	56	57	66	60	56	64	64	62	70	67	84	76	54	96	74	76	80	65	62	95	68	79	44	58	20	76	26
90	79	83	79	73	48	105	62	104	113	77	92	87	68	42	66	98	99	40	77	65	62	81	66	62	61	85	64	45	87	50	50	89	63	50	60	67	69	71	80	71	68	97	80	72	95	67	70	66	57
50	83	58	73	48	40	76	94	103	86	41	25	46	45	66	70	59	84	62	70	84	77	72	72	63	73	74	67	53	73	77	70	55	44	72	69	45	87	54	99	78	89	56	61	59	45	27	39	21	22
104	78	82	78	70	61	32	58	90	78	90	99	96	81	105	95	103	65	96	80	127	110	89	115	104	83	111	74	61	67	89	34	87	79	68	51	74	76	63	60	53	57	84	80	69	45	45	45	51	26
68	81	48	75	49	66	49	71	73	93	73	59	73	51	78	71	55	46	54	46	74	85	53	84	58	35	42	34	52	36	55	62	38	107	59	118	39	87	63	97	24	79	49	65	52	45	28	46	62	36
33	47	30	88	47	70	19	45	58	27	81	72	87	78	64	80	74	62	77	63	75	75	67	92	61	62	47	71	66	53	57	58	69	56	66	80	78	96	68	116	69	80	87	59	56	81	53	84	77	43
83	85	90	75	78	89	114	108	117	115	94	91	61	65	85	54	52	36	67	69	67	70	80	67	55	31	29	23	35	56	60	31	67	94	88	111	75	102	116	118	11	42	38	28	21	17	40	18	27	17
43	76	81	68	54	74	51	87	95	122	52	68	33	40	28	68	63	95	73	94	76	118	73	71	77	59	100	89	37	61	24	49	25	53	24	71	55	63	48	25	72	47	85	72	124	107	29	51	74	112
72	107	78	67	105	89	62	42	51	81	82	98	105	88	63	76	104	95	122	87	109	97	71	66	95	66	65	90	63	56	107	63	68	84	56	60	65	73	112	89	52	60	42	95	70	54	64	56	55	56
80	72	79	48	70	44	70	68	90	80	69	39	88	60	56	65	74	110	62	54	73	79	71	31	73	84	86	49	88	101	103	45	98	102	105	33	82	114	102	120	82	67	82	63	92	50	73	53	81	45
60	64	47	53	77	83	94	97	94	85	65	56	81	61	63	39	55	49	52	49	118	82	47	42	63	48	77	54	59	48	61	78	76	61	55	66	96	103	86	76	63	46	67	60	39	61	61	62	51	35
52	110	58	84	66	85	43	82	76	74	67	96	64	88	26	77	62	96	62	97	41	84	46	88	48	60	66	108	56	93	53	73	64	74	70	61	49	85	64	52	62	89	57	61	26	70	50	84	27	47
65	77	61	62	38	47	29	41	39	94	71	74	62	51	82	35	75	78	33	74	109	80	53	59	75	54	54	63	48	62	84	45	66	40	81	108	68	82	79	124	46	56	83	71	76	69	34	22	58	50
55	121	76	97	92	104	44	82	63	64	60	90	86	112	78	107	68	98	80	108	97	113	79	105	88	100	88	122	87	92	69	66	79	99	64	77	74	124	91	122	77	87	69	86	29	55	68	83	70	27
85	60	59	50	64	73	42	17	68	64	84	83	92	70	101	44	93	78	97	104	107	122	87	81	40	55	86	89	52	57	78	77	90	78	54	38	93	110	96	56	88	91	91	110	37	15	12	16	25	17
60	24	46	40	95	104	26	35	38	40	100	61	116	100	69	36	109	43	93	120	69	73	92	47	36	37	103	83	62	40	69	57	79	54	72	64	89	34	33	55	90	74	122	42	91	65	14	21	103	86
81	113	54	53	63	69	86	89	73	78	65	64	60	72	63	64	74	74	69	77	71	80	68	61	108	106	72	50	60	72	68	56	39	49	77	112	107	111	125	88	53	35	67	59	25	51	21	30	23	22
50	59	73	46	89	88	59	65	61	72	80	84	81	73	53	50	77	57	41	67	81	75	68	76	76	72	63	21	63	68	65	68	36	51	82	65	72	51	91	88	72	58	61	71	43	53	51	58	42	66
46	52	43	41	40	35	104	104	112	115	50	52	58	59	25	21	36	26	44	17	32	32	48	30	43	24	25	24	54	29	35	22	39	35	23	17	61	49	42	39	58	49	46	24	17	12	34	47	90	18
20	47	54	66	51	67	34	67	106	92	55	90	44	50	79	71	64	73	82	112	38	68	56	90	38	80	58	54	25	39	45	25	32	50	25	63	40	74	19	40	85	88	41	52	32	57	45	84	58	67
56	34	50	82	19	21	79	90	67	48	55	27	40	49	30	98	83	45	94	14	130	106	68	91	103	99	89	81	36	59	96	97	49	62	58	65	17	22	54	89	63	54	23	79	115	71	55	67	55	42
111	72	85	93	89	78	66	59	48	68	96	73	85	42	112	47	80	77	60	56	47	62	85	55	86	65	52	41	80	28	60	75	81	43	63	63	79	54	82	51	63	61	53	82	75	85	22	28	36	96
92	97	99	93	91	83	70	84	76	81	129	108	115	94	85	70	155	160	105	64	135	67	138	28	148	111	89	78	79	86	101	47	78	114	96	123	84	87	97	123	67	84	110	83	115	105	22	99	42	16
35	95	29	37	28	31	27	47	77	102	50	51	35	34	29	59	51	65	55	77	52	81	53	73	34	37	39	28	22	71	27	27	54	41	57	77	52	100	42	33	32	28	69	94	43	26	32	29	29	31
50	127	42	44	46	52	112	103	139	139	42	46	51	63	66	38	31	38	16	29	38	23	50	51	75	56	9	9	59	47	33	67	8	53	59	41	18	16	26	86	57	61	19	43	44	39	22	13	42	36
68	106	82	83	91	96	93	66	91	82	83	52	80	78	68	66	77	71	72	74	72	77	100	76	86	67	86	78	67	68	89	84	77	96	99	98	48	99	76	115	79	78	89	77	54	52	81	84	58	35
61	93	113	69	100	76	34	33	50	31	101	89	102	65	13	36	109	126	29	36	77	77	85	86	102	102	47	66	136	133	123	123	114	110	82	88	119	96	130	149	72	49	54	127	50	132	70	61	71	43
116	79	102	97	97	81	87	82	85	61	108	85	89	85	86	99	100	100	100	56	78	61	109	90	103	91	46	103	76	83	71	76	43	98	86	82	74	63	60	43	68	56	73	76	31	31	38	62	29	22
96	102	70	89	62	89	45	70	84	71	92	112	77	87	43	73	80	99	86	53	79	83	35	58	65	55	35	88	60	61	103	59	63	75	97	118	90	119	103	114	56	52	80	78	52	70	62	61	60	75
72	90	73	102	67	71	83	132	86	103	60	97	79	87	72	83	90	104	70	80	90	93	85	91	75	71	74	68	73	88	82	76	72	91	86	116	52	71	53	65	79	84	84	90	97	93	73	78	49	11
87	81	32	45	32	60	46	90	116	110	85	71	29	46	51	19	79	72	45	43	41	43	55	63	71	76	38	40	40	76	32	49	31	58	47	128	35	138	33	59	39	53	36	47	38	51	32	44	55	55
78	79	73	86	75	80	87	119	86	114	87	100	99	103	78	102	76	88	97	100	53	81	79	86	69	85	91	67	58	82	60	84	70	92	61	72	60	74	39	93	75	74	78	94	45	40	53	69	8	14
120	106	95	105	105	138	104	106	70	89	75	80	100	110	106	85	122	128	104	112	106	99	98	95	120	137	64	61	65	107	60	96	76	80	69	90	90	51	93	61	76	88	50	80	56	22	42	62	65	15
90	137	93	132	54	67	123	143	63	70	109	133	74	74	80	85	67	135	100	106	150	138	66	137	91	146	75	73	74	132	63	144	50	130	77	115	102	102	141	119	54	47	51	61	20	40	16	41	15	8
73	96	102	102	83	92	119	121	85	114	80	111	85	97	104	106	97	101	110	90	98	93	101	94	100	98	106	110	67	74	78	55	79	89	43	33	46	48	96	92	84	85	76	95	37	61	70	95	32	26
81	82	122	95	109	120	94	104	113	84	118	136	97	108	127	82	79	90	84	142	81	79	114	113	126	97	99	95	69	75	80	63	91	116	109	71	24	56	130	79	81	85	82	105	34	58	77	97	62	24
70	93	106	122	94	102	61	65	41	54	121	115	90	92	84	117	115	103	92	96	98	90	111	109	115	107	105	122	56	91	88	62	71	68	105	82	55	44	77	92	53	41	70	76	16	69	49	107	33	34
87	74	100	102	109	108	23	72	61	65	98	102	105	109	93	80	97	95	82	123	58	10	115	67	34	46	122	118	24	41	33	28	69	92	55	38	61	43	56	56	99	103	75	84	59	96	97	98	108	83
47	42	41	40	45	59	32	29	35	30	51	53	81	64	49	50	46	48	62	56	76	60	47	47	41	40	72	56	63	50	70	85	34	49	84	56	110	108	43	87	88	91	44	56	59	78	53	71	67	52
65	67	92	87	78	75	46	23	122	141	76	32	67	41	74	15	90	64	68	69	66	40	73	72	86	86	91	81	49	25	47	28	59	34	40	23	90	32	58	25	47	50	52	53	3	54	72	55	11	0
38	51	57	88	70	82	74	91	51	76	54	80	95	107	40	92	65	81	66	83	53	50	56	67	52	35	81	50	28	37	29	49	16	39	45	45	74	56	77	54	109	93	63	62	59	46	52	79	33	40
44	42	74	63	71	56	66	81	107	102	78	65	77	80	71	87	85	69	56	62	51	39	85	77	63	61	60	51	42	39	46	37	35	36	44	93	63	95	37	88	76	66	80	36	12	35	59	61	28	20
48	112	55	63	49	53	36	59	84	102	38	50	44	67	124	117	39	63	89	66	70	65	72	68	56	49	98	40	34	68	41	37	30	18	35	54	44	36	45	79	45	53	49	35	51	29	44	41	24	26
119	136	91	77	64	96	30	62	120	120	75	99	86	79	58	71	119	92	101	94	87	68	70	87	113	116	53	67	120	113	85	94	84	102	117	70	111	101	105	96	94	88	132	87	59	85	50	43	72	61
39	51	63	71	75	74	52	47	109	117	64	60	59	59	43	59	52	59	63	52	57	53	75	53	58	59	34	34	35	42	43	38	42	49	54	40	85	67	56	69	63	65	61	25	30	27	58	64	33	31
92	99	94	62	81	78	79	25	64	87	76	73	79	79	77	106	86	45	90	102	67	60	92	76	90	60	56	32	90	48	63	86	49	66	65	53	43	28	17	70	40	62	50	55	70	57	49	59	39	35
33	44	31	40	49	36	59	74	56	80	72	76	44	43	69	56	64	66	89	75	94	70	79	89	49	97	55	34	69	44	73	60	52	52	76	37	41	54	40	60	45	45	39	55	11	30	25	29	20	8
68	78	89	103	96	93	66	88	88	87	97	100	82	84	63	91	79	60	59	73	67	74	101	107	67	90	14	46	77	84	59	91	51	76	56	60	65	71	48	68	43	67	68	75	46	65	65	44	48	38
59	57	39	58	53	56	46	52	44	49	63	67	61	55	75	68	71	62	70	70	76	76	78	75	48	49	28	54	68	50	75	53	67	64	64	65	62	68	75	67	54	65	67	70	64	82	62	35	79	89
30	25	50	43	40	19	50	17	24	43	34	44	40	61	57	57	18	37	42	71	32	81	51	42	50	43	92	54	21	31	57	33	59	25	50	97	32	73	29	58	83	62	103	83	53	74	39	12	66	55
104	92	78	66	88	59	126	151	110	113	66	73	91	79	64	113	62	117	75	31	127	104	73	112	134	151	68	56	38	74	116	112	46	71	55	75	30	78	17	83	81	86	59	93	73	76	69	79	24	21
66	55	52	60	79	88	53	60	125	117	70	73	110	108	54	59	81	106	80	79	85	86	85	71	59	60	90	88	58	60	53	48	50	62	46	61	84	106	79	87	101	90	46	60	92	86	93	98	78	25
69	60	78	79	94	87	60	86	56	95	56	47	97	71	48	45	86	87	98	63	65	50	73	51	80	64	88	45	54	38	73	36	43	50	61	40	65	31	66	43	86	61	58	73	42	56	77	82	41	30
75	136	103	103	100	102	71	105	122	125	106	113	96	100	49	85	108	71	111	78	91	62	109	69	89	96	75	80	66	54	64	29	51	34	54	31	20	52	49	46	92	90	60	77	40	61	96	111	85	57
67	55	79	60	110	109	63	37	56	65	112	72	112	108	104	73	74	60	79	74	60	53	74	69	81	68	66	65	64	59	52	69	74	51	78	59	112	42	80	63	59	47	97	63	53	71	39	71	108	39
19	91	65	61	53	59	50	66	65	86	67	86	103	89	73	56	68	60	56	82	95	82	63	58	52	40	47	47	56	51	51	43	70	61	58	45	77	93	69	78	72	103	92	64	50	40	68	88	70	21
33	128	67	59	72	76	44	109	113	117	85	97	65	69	72	87	66	66	88	119	61	71	83	73	30	63	73	96	21	49	38	40	52	41	64	97	39	106	90	101	84	74	59	78	73	24	44	42	39	38
64	85	64	67	77	82	77	101	96	99	62	70	94	66	117	101	72	81	73	101	62	87	59	79	61	96	15	52	60	51	54	42	60	82	66	96	72	95	84	78	62	69	55	66	34	55	79	61	78	61
60	81	68	75	63	55	59	48	120	137	70	72	70	65	111	123	59	53	76	61	67	62	79	63	79	47	67	53	44	85	47	77	74	76	54	69	68	73	86	139	72	75	56	59	42	44	66	70	10	16
24	66	45	45	82	73	41	75	49	70	85	84	52	33	88	68	51	71	81	86	92	104	85	68	77	57	60	72	103	51	52	38	41	63	54	41	68	60	51	32	56	51	46	56	44	38	64	40	53	77
72	52	54	61	55	51	52	65	45	45	52	52	42	45	60	51	46	48	53	67	45	56	75	66	71	57	50	78	49	59	48	85	61	82	66	51	69	72	63	54	52	61	60	70	39	56	41	63	24	25
65	95	69	90	106	86	56	54	86	78	84	128	91	88	128	120	86	90	140	127	96	119	88	106	39	99	98	117	44	57	55	63	95	89	100	124	99	93	47	109	54	71	80	100	68	69	38	31	21	16
56	80	71	102	100	44	68	63	108	100	76	70	69	54	61	87	108	114	70	81	71	94	79	39	87	94	37	43	87	94	75	81	73	68	49	70	44	55	68	85	47	47	43	49	34	33	52	59	23	25
45	119	46	87	49	60	95	111	104	91	82	97	63	77	80	64	79	80	79	101	58	70	91	90	72	47	59	70	64	65	48	33	25	63	46	40	88	74	63	50	48	71	43	34	96	103	36	51	16	19
52	48	35	35	28	28	48	39	64	72	31	18	30	51	22	31	50	72	41	37	53	60	28	28	46	36	32	46	58	67	72	51	69	65	68	59	66	68	44	66	38	71	61	86	69	75	55	47	58	41
73	70	61	73	50	104	111	109	140	115	87	122	77	105	97	106	51	92	93	91	52	54	62	99	70	74	37	63	69	56	65	44	46	35	55	55	52	24	54	40	65	62	24	39	36	59	64	56	6	9
95	80	80	65	91	98	115	103	125	113	75	81	83	80	112	100	84	50	84	92	74	84	98	77	60	71	42	9	86	65	92	59	72	92	97	88	88	68	103	89	79	83	96	73	32	44	18	50	22	12
24	36	24	26	23	17	43	36	42	31	34	29	39	55	84	27	51	36	104	64	70	90	38	39	42	35	91	160	12	31	49	28	24	19	67	121	47	67	23	10	20	43	122	86	101	101	79	46	15	31
13	104	47	36	69	44	45	63	54	43	67	70	57	55	58	52	57	56	66	96	78	111	70	22	44	62	36	61	51	72	101	31	33	56	33	53	34	89	36	89	52	54	45	57	51	66	9	33	41	36
66	65	35	46	60	72	48	20	56	64	48	87	66	59	77	65	94	39	103	52	99	78	29	61	104	79	35	42	94	72	73	108	58	82	67	45	39	73	77	77	62	70	41	46	33	28	82	86	31	43
31	42	23	38	29	37	79	56	48	52	34	50	53	55	39	36	35	23	44	41	40	44	37	46	36	43	33	32	89	52	36	34	52	31	41	75	55	52	43	35	39	55	41	82	13	32	34	27	22	61
85	101	114	109	87	106	111	48	120	124	107	124	118	118	101	102	111	118	38	86	82	46	90	74	88	54	85	90	49	102	58	24	69	88	49	84	70	96	73	90	90	108	44	70	13	48	62	93	26	24
76	94	119	88	123	131	54	70	81	98	108	115	118	117	85	98	77	93	95	106	83	64	108	112	67	49	107	112	52	51	43	44	29	95	78	54	58	68	65	61	84	88	84	84	95	55	104	113	119	117
122	129	128	114	97	114	108	97	121	124	116	136	119	121	101	90	107	133	97	110	60	65	103	103	120	112	107	122	81	86	71	69	85	107	74	89	66	61	88	100	101	103	105	120	88	73	94	110	37	22
79	68	109	112	91	70	101	68	96	110	112	121	89	87	79	36	98	104	67	79	74	78	112	116	78	85	105	90	53	46	48	50	84	38	82	63	84	44	103	49	78	98	81	85	76	77	61	74	52	34
97	95	72	67	82	53	79	70	84	73	94	101	88	91	28	59	85	56	45	76	67	89	58	28	83	53	84	76	75	52	88	47	51	62	61	23	75	75	16	64	33	60	80	55	50	61	13	92	37	22
53	57	45	52	59	50	59	59	69	80	65	43	60	41	63	56	73	25	70	66	70	49	63	50	62	61	51	62	55	29	44	40	43	56	33	28	75	69	75	42	35	58	53	43	19	29	31	51	37	37
47	62	29	34	27	47	63	66	108	93	40	61	68	62	57	44	70	29	76	101	110	112	54	48	59	37	22	23	62	35	51	69	59	19	66	38	37	9	76	93	34	44	48	55	57	46	35	44	27	30
93	80	108	81	107	86	71	41	71	89	93	69	108	92	101	82	71	56	45	76	49	44	77	53	78	59	59	54	67	50	49	60	60	77	32	58	92	75	72	67	102	105	62	75	50	70	52	46	19	27
76	85	109	79	107	92	64	51	81	71	106	148	82	87	76	93	81	50	86	92	97	82	102	107	68	62	68	39	55	31	62	65	45	107	59	112	91	99	71	124	65	85	73	45	77	55	54	41	47	28
55	44	51	41	52	65	36	31	82	62	63	63	58	69	50	48	61	53	38	48	65	73	75	45	49	65	101	84	54	50	60	78	60	65	50	26	77	44	95	50	70	41	120	62	81	122	92	53	33	42
42	99	39	58	49	71	82	80	100	72	66	55	55	60	39	96	63	69	44	74	51	89	86	66	60	85	61	68	29	92	67	81	37	30	53	54	36	71	57	72	35	69	50	70	67	104	53	70	46	41
61	121	79	86	67	68	89	101	100	93	90	76	62	60	35	96	78	108	63	33	50	46	77	63	106	117	46	44	46	34	40	44	64	18	55	27	57	80	34	24	81	53	94	40	122	77	28	31	37	32
122	109	54	82	50	60	26	13	62	53	105	151	104	77	26	39	140	104	52	84	63	113	108	129	64	87	45	102	89	100	89	134	109	102	104	47	138	73	65	110	57	119	95	90	74	131	18	39	76	83
86	68	129	119	110	102	90	108	75	114	104	103	97	114	79	59	105	65	95	64	77	68	114	67	114	106	96	76	98	115	74	45	98	113	62	96	90	95	74	54	102	102	46	21	34	60	55	27	71	45
67	101	40	62	55	66	43	22	87	51	39	70	34	83	11	34	24	89	37	62	122	78	71	72	56	118	34	53	8	71	68	44	40	57	79	65	18	113	48	81	19	15	50	100	36	46	19	36	6	6
86	71	48	45	51	34	6	36	78	104	38	69	53	50	65	99	84	132	51	40	107	92	96	81	83	34	35	44	105	85	40	83	55	123	22	57	126	155	102	99	33	59	50	51	58	40	16	40	15	10
47	114	62	105	72	91	23	54	58	92	79	85	76	87	89	106	99	116	57	114	83	95	95	129	26	102	93	116	54	78	78	64	47	23	95	77	52	75	63	87	81	77	87	101	95	107	39	71	46	11
82	64	78	109	89	72	21	106	73	84	57	87	91	121	78	104	107	95	74	60	118	98	47	106	96	112	75	90	89	89	114	116	54	22	110	88	61	80	90	85	72	88	87	49	64	58	63	71	28	23
35	99	50	91	43	79	13	46	41	70	79	105	52	90	150	118	53	84	2	80	68	71	99	64	56	83	43	33	24	94	33	44	14	20	26	40	49	137	61	62	21	22	30	29	54	43	23	38	36	9
82	80	113	84	123	95	32	84	98	105	118	142	134	123	60	66	87	35	52	62	66	72	77	103	115	64	31	64	94	64	97	63	69	75	89	106	98	73	119	52	44	82	27	84	42	61	82	108	19	40
38	98	33	55	40	57	26	62	25	90	52	68	59	70	59	67	75	68	48	76	80	95	54	70	61	73	53	62	47	59	56	39	42	69	39	72	30	40	46	53	45	58	60	58	35	53	19	23	41	48
71	73	77	50	66	47	48	42	66	51	66	52	64	73	66	49	61	33	46	45	45	37	57	39	44	21	44	40	71	51	44	31	39	34	33	41	34	56	49	53	63	66	64	21	23	43	18	24	35	47
36	27	41	59	36	22	57	60	46	20	27	24	28	18	62	79	47	26	43	16	57	42	63	71	45	67	17	36	17	9	42	38	35	46	28	15	23	22	32	53	41	42	43	30	38	45	39	39	13	34
45	52	57	43	42	36	40	45	36	39	42	51	35	37	52	55	51	31	58	52	65	65	63	61	45	33	23	43	59	49	52	49	37	55	62	18	43	33	48	48	45	46	9	48	20	25	43	32	37	51
42	23	60	67	72	76	17	35	37	57	68	66	63	73	32	40	46	52	54	32	36	27	65	48	53	50	58	71	46	55	41	41	33	30	27	43	46	43	38	38	74	75	62	35	61	79	41	56	59	46
50	66	55	34	43	44	74	86	62	61	52	45	54	53	74	71	40	21	21	38	45	49	62	36	49	70	41	40	40	26	32	47	20	42	33	31	15	40	39	53	29	46	35	33	37	40	17	13	41	12
54	49	21	56	54	32	32	18	68	69	41	45	41	70	43	25	52	65	44	53	47	50	8	43	50	60	15	35	51	48	44	46	42	9	64	32	40	23	30	35	27	50	68	64	57	77	41	20	11	37
43	46	32	47	33	36	45	39	37	33	31	38	35	42	33	43	27	28	36	34	44	34	41	34	48	54	26	31	32	35	26	27	30	33	15	19	30	24	38	32	40	50	19	26	31	55	25	38	38	58
82	65	35	30	25	17	75	34	60	86	53	40	15	21	26	17	64	27	2	4	12	33	17	12	48	15	20	19	59	55	12	23	39	26	61	68	10	81	49	14	7	30	13	12	60	34	20	22	11	11
40	39	58	44	36	32	59	51	57	76	19	41	42	45	47	56	45	40	39	44	39	29	60	43	38	28	15	55	36	22	14	49	23	27	27	15	8	43	27	19	32	44	18	34	23	18	26	43	14	18
62	84	20	23	58	47	56	70	58	87	37	30	36	35	54	74	43	24	41	59	51	56	66	33	84	50	24	28	42	44	37	29	28	14	35	56	30	27	40	31	30	27	15	19	23	14	19	32	21	26
58	73	20	41	37	69	55	41	75	93	46	63	29	36	67	42	41	47	12	57	65	43	43	44	46	39	17	11	77	40	35	63	23	61	44	49	40	28	35	59	16	21	14	25	13	14	15	31	25	33
29	47	66	71	83	67	40	45	58	54	52	46	69	63	76	55	48	15	31	48	50	41	62	47	60	41	26	18	12	30	25	26	49	35	21	23	33	46	19	52	61	48	70	19	26	23	35	43	14	35
31	39	36	53	31	31	36	11	56	69	52	59	44	40	45	43	44	47	35	42	38	38	39	42	55	44	32	57	37	55	53	43	53	72	42	61	31	48	39	45	46	32	17	30	32	32	30	44	15	9
56	29	51	48	68	65	29	27	45	43	63	45	70	52	42	39	30	46	29	16	29	24	63	43	51	24	33	27	26	41	17	23	14	14	49	14	32	41	18	30	59	66	52	67	67	59	43	31	39	64
35	45	47	50	38	25	41	56	37	48	43	41	46	51	27	56	58	43	35	62	54	60	67	61	51	77	71	33	50	34	39	36	26	23	25	37	20	20	16	27	35	24	30	24	39	35	62	47	51	52
37	45	36	34	36	29	25	37	45	35	30	33	36	35	42	34	48	25	39	28	71	48	38	38	32	41	52	42	45	47	34	33	27	26	50	25	59	56	42	60	41	45	72	30	62	53	17	38	51	37
24	55	30	31	31	22	47	53	56	75	32	41	37	32	21	28	44	40	29	50	51	48	34	49	25	38	36	59	43	46	42	72	36	45	42	39	42	40	36	63	22	27	29	42	21	51	26	38	21	22
50	62	38	41	34	32	59	58	54	56	31	25	34	24	50	42	35	24	33	39	27	30	40	28	31	30	32	23	48	48	32	58	27	30	38	58	37	70	50	42	35	32	42	34	50	13	32	30	10	23
40	50	40	39	47	63	57	48	63	53	46	54	50	49	36	54	60	49	41	57	53	63	60	61	46	42	67	62	34	31	53	60	43	26	49	47	43	41	53	47	46	38	53	66	58	49	38	34	34	30
37	42	38	41	44	46	29	26	29	26	49	46	43	43	37	36	25	44	51	49	48	43	27	29	42	38	56	50	30	21	53	48	26	18	48	56	73	39	45	29	48	51	35	50	48	35	15	33	69	57
51	55	52	48	50	53	28	32	37	39	60	53	39	41	51	53	51	74	45	49	53	45	48	65	57	59	46	50	46	52	48	44	59	52	50	57	53	84	67	60	34	50	52	47	41	51	35	41	61	56
48	47	54	52	54	44	29	61	41	50	50	46	54	50	36	42	72	70	40	38	55	64	64	70	48	57	39	31	67	54	64	23	53	48	33	32	41	66	45	63	42	36	38	33	14	14	15	31	28	17
29	30	45	26	25	27	57	62	57	59	37	45	30	41	57	60	34	30	38	35	77	74	32	32	28	39	34	51	33	17	38	89	34	39	38	78	29	55	35	56	30	50	50	58	75	87	19	22	49	50
41	55	77	75	48	65	49	37	43	41	51	52	47	48	61	53	69	64	42	51	44	64	49	58	57	36	31	46	30	52	69	34	48	61	69	73	39	71	84	51	45	49	34	59	20	28	12	44	44	31
41	59	49	52	42	51	55	40	69	72	55	62	43	50	59	59	53	51	34	57	43	42	48	50	49	54	50	41	56	54	36	37	37	46	60	61	66	62	50	48	82	56	57	48	42	43	38	49	34	15
49	39	48	55	48	56	41	24	44	53	49	43	56	33	32	35	65	55	63	53	59	68	55	69	43	36	46	44	49	50	65	50	60	62	79	32	63	34	79	34	35	32	61	41	41	29	25	53	50	31
56	58	53	58	51	54	49	54	55	50	51	47	48	46	40	45	68	60	52	59	50	57	55	56	54	54	38	46	52	48	26	37	51	38	53	51	50	27	49	51	36	47	59	74	34	27	35	36	33	17
55	42	38	30	37	35	44	43	49	54	64	63	40	40	31	31	67	58	39	52	58	58	52	49	51	55	42	62	63	61	60	56	61	71	36	27	38	56	47	55	51	38	48	68	67	68	44	49	53	49
44	42	68	68	46	59	29	54	45	56	44	45	35	39	36	46	57	53	47	63	56	55	38	32	54	57	47	51	35	51	56	52	53	55	71	56	33	41	38	48	41	64	66	77	51	54	19	33	61	61
33	35	42	47	45	45	48	33	62	54	47	39	51	42	38	37	38	39	22	35	60	43	46	46	45	41	34	37	38	27	46	27	36	33	48	69	63	89	54	74	39	62	44	36	69	77	51	53	62	28
61	57	80	79	44	67	26	24	47	24	54	70	62	56	38	37	56	43	36	46	35	29	66	37	61	44	25	20	49	56	27	34	34	50	45	36	54	33	43	41	26	48	16	23	14	32	35	74	30	27
61	58	49	44	68	49	47	53	46	48	72	54	72	69	68	49	58	48	36	49	50	55	58	51	47	50	52	28	36	49	42	42	50	36	52	43	65	66	36	49	72	56	48	51	47	30	58	44	46	40
60	81	70	69	40	63	45	69	38	34	49	66	49	55	51	71	74	76	44	68	59	76	93	75	75	74	60	75	35	59	34	60	17	33	24	33	18	39	56	50	18	24	23	31	30	21	52	33	25	12
28	49	38	38	43	35	73	56	50	69	30	35	31	51	63	48	35	25	19	50	28	26	37	44	49	23	23	60	42	41	31	16	23	43	16	26	19	13	14	12	40	55	28	26	19	46	14	39	15	24
21	19	35	53	23	46	27	18	40	22	21	40	33	39	12	21	74	14	30	68	21	13	36	55	62	82	33	60	40	10	7	13	16	23	23	11	39	35	11	15	36	34	48	34	47	78	55	73	57	90
67	55	33	20	40	30	41	55	49	50	54	40	51	63	63	49	42	53	66	61	64	62	51	59	34	27	55	49	60	54	40	78	55	68	37	64	105	84	88	75	68	64	24	29	24	51	8	20	13	14
60	33	49	44	55	52	24	7	51	23	32	41	65	61	53	39	40	49	36	53	61	58	46	48	33	41	48	34	47	31	46	41	38	40	53	46	39	25	40	24	62	47	66	69	76	46	65	51	41	36
60	59	17	31	28	22	26	29	37	36	70	59	43	38	77	82	79	45	67	64	79	64	54	72	55	35	33	39	35	51	75	73	57	37	36	52	63	52	66	34	15	33	19	35	61	64	11	15	29	42
46	70	33	68	17	35	19	27	32	39	28	36	31	24	70	44	37	45	48	75	42	34	45	42	43	34	27	35	32	29	37	34	31	48	35	38	52	76	25	26	26	24	58	42	69	31	9	15	13	8
31	30	38	36	25	31	43	33	45	44	32	41	45	48	40	31	34	44	27	39	42	23	39	43	37	52	30	39	38	46	33	16	45	10	41	13	47	28	44	31	27	37	61	47	31	29	40	11	77	57
29	55	45	31	60	48	35	29	48	56	32	57	54	52	48	24	38	28	44	49	49	63	41	26	32	40	55	41	40	46	37	34	30	26	38	53	20	38	22	38	42	43	34	27	39	22	48	32	54	44
41	38	44	30	30	41	27	25	48	52	49	61	50	56	59	71	59	57	36	42	70	66	35	61	25	23	40	19	56	61	48	79	43	61	70	71	81	98	58	67	60	72	74	70	45	74	8	4	24	30
31	43	35	32	37	38	31	48	58	39	34	45	49	66	41	45	21	50	23	43	54	51	29	21	27	28	24	16	34	69	28	68	35	27	26	53	37	44	34	60	46	48	27	38	28	42	42	30	43	28
51	73	56	40	41	44	59	68	52	55	20	28	45	41	24	27	45	53	34	54	31	47	42	45	54	55	28	37	31	40	18	56	18	45	29	25	25	23	20	25	39	43	48	47	37	50	13	9	56	28
47	63	42	22	34	20	81	59	74	76	49	46	45	38	40	33	54	14	39	39	72	46	36	22	62	36	32	30	54	48	66	44	69	45	40	62	58	77	58	56	27	38	57	34	46	25	25	27	16	23
45	46	71	72	58	66	54	35	31	37	63	51	64	63	31	71	43	35	26	31	31	34	63	40	60	58	49	57	42	47	36	79	60	48	37	41	39	41	39	31	40	32	50	59	27	45	77	89	64	35
43	32	36	25	44	40	38	42	62	55	53	19	52	56	26	22	33	18	15	18	22	17	39	34	11	28	25	13	47	36	28	47	48	29	35	25	48	30	45	29	27	32	38	43	18	24	3	19	43	80
39	38	9	28	28	39	49	64	75	69	21	30	42	44	21	27	57	54	31	25	50	42	18	38	84	60	28	28	65	74	57	42	33	53	23	50	28	27	37	58	37	28	24	27	4	10	31	34	45	12
48	63	38	32	39	31	41	51	56	47	51	35	37	27	30	38	51	46	53	25	57	48	45	39	42	48	48	34	37	38	37	40	32	28	53	44	51	44	49	34	57	53	51	39	49	54	40	31	46	39
31	30	57	51	70	55	35	60	42	44	57	35	58	50	47	46	40	60	43	29	42	62	69	58	51	66	64	50	21	19	50	31	35	33	28	23	28	45	29	49	51	44	44	21	25	19	19	13	27	17
18	59	58	52	74	76	43	16	42	61	46	30	27	25	34	26	31	33	35	37	19	36	26	33	58	63	36	21	65	57	10	19	32	27	45	40	24	31	13	44	43	45	30	48	12	24	52	39	33	15
67	71	66	62	48	42	55	57	76	81	63	51	42	49	21	40	60	57	14	57	61	48	48	48	63	42	21	60	76	65	61	64	47	64	57	65	73	76	63	88	13	24	47	59	10	21	38	40	12	21
34	81	30	24	22	34	80	72	55	59	29	13	35	38	26	35	28	33	25	29	21	42	27	37	35	67	26	36	22	55	33	63	30	54	28	107	17	89	31	41	30	36	29	50	4	7	28	14	17	4
56	77	62	23	35	29	67	51	49	63	32	56	38	41	31	26	43	40	42	32	44	40	31	54	82	72	32	14	61	66	45	42	26	37	17	28	21	45	11	37	30	36	36	10	25	18	19	32	24	19
42	64	48	58	37	35	21	48	49	61	23	33	19	30	32	41	42	63	24	41	63	56	54	35	38	64	18	26	42	34	49	46	39	48	35	65	74	70	58	56	18	29	17	25	43	9	21	23	27	29
57	54	58	59	65	70	33	18	53	42	61	71	48	64	50	55	62	65	37	34	58	17	57	50	45	29	14	11	45	47	62	74	45	71	47	48	67	75	46	37	44	50	43	27	31	26	47	49	20	14
66	107	38	91	20	37	92	1	105	70	28	47	22	19	57	116	63	63	27	80	29	34	39	61	29	95	9	70	38	24	28	3	2	16	8	62	2	14	15	45	13	45	33	80	81	81	13	23	10	13
32	29	48	57	52	53	19	39	62	61	52	47	55	59	29	37	41	36	48	54	37	45	47	51	36	30	58	51	46	47	34	37	48	62	35	24	38	29	39	33	55	58	52	60	18	38	47	33	21	34
35	59	45	48	44	41	38	60	68	76	46	30	43	40	44	30	46	24	38	29	23	45	42	40	38	32	36	23	40	18	23	17	37	20	32	22	30	28	51	41	39	62	36	41	38	36	40	27	30	27
64	84	66	66	54	52	50	48	39	47	62	69	65	60	57	57	54	70	69	72	62	68	62	57	54	62	53	66	56	57	66	75	43	72	54	59	32	56	57	47	44	49	36	46	22	60	17	31	23	18
36	54	41	32	54	63	32	34	42	53	66	64	69	58	39	45	49	57	52	58	51	74	60	51	53	50	59	71	35	47	18	56	28	60	42	60	42	54	38	53	39	44	58	73	27	35	43	44	35	46
51	52	61	56	41	39	55	53	43	55	61	44	42	48	24	38	53	58	44	30	31	33	61	58	62	67	33	31	48	30	47	38	13	28	36	24	47	25	58	44	61	47	43	59	17	21	47	47	34	28
24	48	36	39	27	42	26	67	89	66	42	39	48	29	81	66	37	64	44	75	38	40	44	42	33	30	42	49	34	52	28	29	26	29	34	63	26	57	23	45	41	47	41	42	43	45	8	24	42	22
65	74	70	48	53	58	83	36	47	68	64	74	43	59	43	24	53	41	20	23	55	24	54	43	38	32	44	39	43	45	44	25	41	44	48	64	57	41	49	51	49	57	47	43	24	14	46	38	37	8
38	25	33	42	29	30	50	41	47	43	34	30	24	19	51	34	42	28	50	18	51	42	49	47	36	38	29	30	46	47	49	43	36	48	45	19	47	29	46	41	33	27	36	31	42	36	35	31	36	39
60	77	64	58	63	55	36	48	57	52	54	65	71	61	51	63	89	58	40	53	62	54	74	47	46	68	22	35	38	34	44	40	38	65	26	25	50	40	48	65	66	75	9	34	12	8	10	11	14	16
41	44	40	40	37	50	44	34	38	46	53	52	52	51	52	46	53	34	51	51	60	54	29	44	37	32	48	37	24	29	30	37	55	38	35	14	42	56	51	43	52	47	43	18	41	45	42	32	32	29
30	42	19	14	28	13	13	12	33	58	25	16	15	72	37	31	56	50	20	28	71	45	51	17	15	18	18	30	28	56	54	62	51	41	11	18	14	15	35	43	42	15	36	11	45	16	57	9	25	8
42	46	30	38	25	23	34	31	69	53	42	45	33	39	32	38	52	41	35	31	40	33	37	34	30	48	37	38	16	43	13	28	54	66	27	37	61	52	28	28	55	45	50	37	29	49	21	30	26	17
34	50	32	40	46	37	38	68	38	46	32	23	36	29	9	24	61	47	50	26	46	43	21	33	43	47	41	49	57	37	52	43	71	17	48	60	43	61	23	75	30	37	40	39	52	48	29	35	20	27
51	54	56	53	50	60	59	58	59	56	49	37	56	46	56	52	56	44	53	51	42	47	68	54	65	65	22	43	28	48	33	36	27	36	29	49	34	45	43	41	50	55	49	55	39	61	29	41	23	32
23	35	30	34	54	28	34	31	48	35	29	26	65	54	56	53	46	34	75	67	36	30	60	42	45	40	74	74	20	18	41	29	54	20	47	54	42	44	52	31	69	64	30	38	28	27	36	45	29	31
50	74	13	45	21	40	44	63	69	61	44	59	25	27	47	44	42	75	27	52	49	60	32	47	57	87	16	35	41	73	24	92	20	43	17	20	41	48	30	77	31	47	34	24	20	12	15	19	18	30
42	42	51	35	50	34	32	48	61	72	32	36	46	36	35	45	34	47	66	30	61	40	34	71	20	26	22	32	61	50	62	52	30	33	43	59	15	26	36	61	42	40	37	24	38	36	25	29	29	28
30	53	41	57	43	42	64	73	74	65	36	71	49	63	61	41	48	45	62	41	76	52	67	29	53	48	37	54	58	5	38	17	55	45	27	46	23	61	33	43	48	50	9	9	29	16	63	53	32	39
54	92	38	44	28	51	16	101	34	60	32	64	27	19	82	57	41	62	14	78	34	62	42	57	58	72	5	5	39	77	30	36	26	69	23	80	42	41	51	39	14	16	52	40	36	41	22	12	11	21
57	48	52	29	45	22	82	62	62	58	16	13	30	32	50	52	70	69	45	24	41	10	65	36	69	34	41	18	50	41	48	42	17	35	34	35	41	39	41	46	35	34	32	13	18	13	36	47	17	9
27	40	46	41	61	77	32	26	51	36	62	48	63	61	42	49	63	71	42	43	31	43	61	64	24	47	46	48	35	49	54	58	55	40	38	44	43	33	20	32	58	47	52	51	8	30	32	29	27	22
57	47	42	41	66	63	28	35	65	78	65	67	47	39	39	42	65	63	45	42	49	53	50	66	63	63	75	66	41	60	50	48	54	53	70	54	49	56	67	53	31	41	58	62	18	26	11	30	34	26
71	59	30	49	51	52	53	42	48	41	48	71	74	65	44	52	68	45	22	31	21	33	39	35	20	37	32	42	57	64	60	73	54	50	59	38	57	57	57	47	56	52	27	63	41	37	54	23	65	31
34	44	51	27	61	56	13	31	39	52	49	51	70	60	26	17	53	46	62	41	32	40	53	42	30	36	25	62	36	36	37	53	50	53	29	22	33	59	36	47	74	69	52	35	53	46	45	51	46	50
27	18	26	33	34	24	29	31	39	37	28	38	31	26	24	31	35	31	15	34	40	34	21	30	28	25	31	28	41	43	44	44	32	37	9	23	59	38	46	23	51	58	27	16	28	56	37	32	46	50
59	72	44	39	43	40	58	50	73	56	52	61	51	42	48	52	50	53	45	49	60	39	41	55	55	42	54	35	76	71	42	58	50	44	30	28	45	44	76	71	44	41	21	39	40	26	41	32	48	22
96	70	31	38	36	26	72	72	79	74	35	25	28	20	40	32	45	42	25	14	31	28	44	41	85	66	16	15	55	23	30	24	27	24	13	36	31	27	30	24	22	20	19	8	21	17	27	25	8	1
50	54	52	52	50	47	36	33	52	47	65	52	59	64	41	46	48	37	43	54	53	61	36	53	45	46	52	46	26	38	38	57	37	25	29	55	50	65	42	50	68	75	71	60	65	56	60	70	49	51
30	45	25	59	42	37	42	46	54	66	27	37	52	43	50	50	28	52	14	62	38	42	31	49	27	72	23	35	34	46	36	51	18	42	22	63	31	25	38	50	45	45	48	72	50	47	53	38	66	57
46	60	39	52	53	57	74	66	82	77	62	59	51	55	66	54	58	46	68	61	65	54	41	52	63	58	47	65	47	50	48	61	50	51	45	37	63	73	37	65	71	32	43	46	36	39	26	23	28	25
40	56	38	20	46	37	50	50	55	75	43	42	48	36	58	51	39	70	15	27	63	64	37	41	92	83	43	36	79	66	79	17	28	15	42	64	62	59	67	16	34	39	41	25	24	17	44	44	18	11
45	54	50	48	62	43	50	37	41	50	54	55	70	63	29	57	50	42	32	41	25	47	53	55	28	35	44	51	53	46	46	41	39	49	42	32	26	55	38	41	55	29	42	41	30	33	22	20	58	26
25	36	39	43	23	43	72	47	29	79	50	41	28	37	21	26	23	22	20	20	23	20	21	42	38	41	27	42	29	40	39	17	51	16	49	44	28	51	44	30	35	37	45	41	44	24	29	22	34	25
63	82	40	48	31	38	64	60	57	72	30	46	35	45	43	43	54	57	43	41	70	64	43	43	41	45	45	24	57	66	68	69	43	54	36	73	40	56	75	65	40	34	33	42	22	22	42	28	23	22
55	79	17	38	37	45	23	16	67	60	50	40	47	52	46	40	27	45	19	38	53	38	36	27	27	37	12	29	56	58	15	67	15	26	19	42	33	44	26	63	36	41	31	34	19	9	30	31	12	24
52	61	32	51	33	23	49	44	62	53	34	33	29	34	45	50	33	57	39	50	50	66	46	54	48	51	37	28	55	59	53	65	61	68	57	61	80	86	70	66	51	64	36	45	33	16	13	17	41	50
27	35	48	48	31	38	27	32	45	32	29	36	34	37	32	41	40	30	35	31	20	40	38	44	32	45	11	37	32	33	30	16	29	32	41	38	38	32	35	31	42	38	47	31	48	51	45	30	13	15
48	62	35	39	24	31	49	45	42	70	27	23	16	54	46	46	30	52	25	55	34	40	30	30	34	73	26	15	60	70	37	68	24	51	30	62	43	73	78	65	42	38	6	57	13	8	44	42	31	33
48	34	26	19	12	21	39	12	37	55	31	16	28	29	13	52	49	26	28	22	33	51	45	38	20	16	19	23	63	72	10	50	17	12	24	16	24	14	17	36	21	24	19	28	34	18	38	35	10	20
33	43	39	30	47	29	47	42	48	65	51	38	52	45	19	33	48	44	35	44	46	30	43	50	56	39	44	44	41	22	49	32	41	38	34	43	33	62	50	50	45	56	29	27	47	24	37	23	33	21
28	38	31	37	32	38	43	31	44	51	34	45	41	29	22	29	34	28	39	38	32	27	30	31	20	20	36	42	26	28	26	30	31	24	34	41	26	34	37	31	50	48	28	14	44	11	17	22	21	28
49	63	41	35	26	33	35	46	40	60	50	46	36	40	41	34	23	13	43	43	61	47	41	38	46	48	41	48	47	51	47	33	30	33	25	42	9	29	25	31	39	45	41	26	36	40	44	55	39	35
62	52	55	31	20	35	57	44	23	40	38	37	57	63	10	28	56	52	69	54	79	43	80	28	63	59	69	32	43	49	51	23	49	23	62	32	43	43	54	74	29	26	22	24	27	37	26	20	28	35
64	68	56	61	49	62	47	48	40	29	60	59	37	31	50	72	65	64	62	61	79	66	65	72	47	45	24	61	64	61	55	57	20	42	29	60	60	48	45	59	63	69	59	59	62	51	25	22	63	16
49	61	51	38	46	78	62	20	31	52	48	62	39	67	114	46	64	24	85	54	73	74	111	48	90	32	99	69	76	45	90	80	54	10	59	11	48	42	54	23	10	14	35	25	6	16	24	74	32	3
54	62	38	45	40	37	58	61	49	56	22	18	34	29	57	57	19	29	47	59	39	44	36	35	59	73	45	51	37	38	11	59	18	23	12	26	26	29	18	38	39	39	25	20	36	30	38	36	43	38
41	57	41	47	42	48	45	43	50	46	42	55	42	41	52	55	51	61	63	67	58	57	48	51	50	47	43	48	44	54	43	49	40	37	47	38	37	36	27	47	57	59	42	51	53	24	49	56	51	52
53	30	49	58	50	47	51	23	61	60	64	51	52	56	55	44	56	44	59	42	16	59	52	53	28	33	58	56	22	36	28	24	30	34	34	20	49	58	41	29	54	43	69	40	31	35	49	41	34	31
64	22	49	30	39	56	67	43	82	78	41	21	38	35	41	44	32	41	37	39	52	42	45	31	52	33	58	33	28	25	42	31	24	29	37	27	37	23	21	56	54	39	40	28	69	45	32	24	58	23
43	58	49	57	51	37	61	61	70	59	38	57	29	32	59	59	27	42	41	28	68	31	33	36	68	76	5	37	68	71	37	27	27	51	30	23	35	25	44	47	39	59	39	23	24	30	14	31	30	17
49	71	57	53	47	52	56	48	43	57	51	62	35	40	53	53	45	55	43	59	42	36	46	42	40	42	45	45	32	43	32	41	65	68	44	47	55	51	46	33	52	44	76	62	56	40	41	47	37	43
48	20	66	69	64	60	23	52	61	76	56	63	60	49	21	23	63	51	57	60	52	33	66	63	62	67	43	64	40	50	62	39	60	57	50	49	63	65	49	59	51	33	61	66	53	50	37	56	31	16
57	58	62	54	60	52	57	47	56	54	60	62	41	37	51	48	53	47	22	11	6	14	56	44	53	55	9	14	18	37	17	19	20	28	23	16	47	27	56	37	35	23	47	32	21	23	33	22	23	10
60	32	62	64	62	66	24	40	32	39	59	46	38	53	71	53	58	56	68	46	37	58	65	50	37	44	46	53	55	23	68	45	61	66	60	45	49	41	55	50	42	40	39	61	15	46	29	28	43	44
70	79	50	41	50	49	60	69	68	77	67	66	50	45	73	49	48	59	60	54	52	29	56	41	42	72	32	26	69	65	67	33	68	59	51	58	41	58	64	61	38	38	26	42	7	30	19	31	19	61
39	54	46	39	22	24	45	61	63	57	46	50	49	54	38	58	41	26	36	39	36	39	44	40	32	33	33	33	31	27	23	40	28	18	36	32	34	26	24	56	42	39	42	33	29	40	35	40	37	46
24	49	36	30	46	37	57	43	53	35	45	32	36	35	32	34	51	31	23	22	27	37	33	36	31	41	30	31	28	9	19	46	36	25	32	31	37	30	29	7	39	42	21	31	17	19	46	32	25	24
50	52	46	56	36	63	38	38	53	59	46	44	39	63	52	58	67	56	64	44	54	48	42	53	57	56	30	57	59	55	51	31	54	38	56	51	36	51	45	42	57	64	33	51	24	24	27	50	43	25
77	83	65	71	68	63	81	86	62	48	67	65	59	67	70	76	54	67	70	75	57	64	66	66	37	66	23	45	36	45	57	66	14	57	45	41	20	18	15	20	38	13	24	39	32	30	46	21	26	24
36	48	52	45	59	58	34	52	62	64	64	73	59	68	28	43	64	45	26	36	42	37	42	38	49	38	44	27	52	42	42	35	33	38	33	50	25	52	42	36	54	49	23	39	16	21	33	53	36	29
35	20	23	53	15	29	21	16	53	47	42	30	42	51	18	26	22	49	41	31	29	46	50	30	23	11	20	46	8	15	13	26	19	11	40	17	53	40	50	4	26	40	68	42	70	70	28	38	20	33
36	42	52	63	53	61	23	26	31	31	69	61	80	72	29	34	60	58	23	20	25	29	54	55	70	53	30	33	74	48	43	37	84	81	68	32	63	91	52	72	50	64	70	56	63	70	62	17	50	42
52	59	37	32	34	37	50	55	57	63	34	31	29	28	73	57	28	35	38	41	27	26	42	46	37	71	34	42	11	43	13	30	38	14	34	29	30	48	22	57	18	23	54	34	8	4	4	35	6	2
85	79	69	62	35	50	48	66	72	72	68	73	43	44	53	75	90	104	94	66	85	94	89	101	78	79	78	84	74	68	64	76	59	61	76	65	62	66	51	61	38	36	60	60	69	68	36	39	20	29
61	85	47	65	45	43	62	73	76	63	55	60	50	50	70	64	49	86	61	42	30	30	54	41	45	54	29	30	40	60	41	27	54	49	37	19	72	80	55	42	57	66	51	20	27	44	31	57	54	27
59	66	17	38	39	44	58	73	67	65	42	50	49	43	55	59	39	45	40	62	41	59	48	54	39	50	39	38	56	70	27	30	36	46	50	49	50	56	69	70	32	42	42	28	28	30	18	34	23	10
28	40	31	28	17	23	33	34	31	44	23	31	25	29	18	24	32	43	25	35	35	54	35	30	37	34	41	26	34	32	35	47	27	25	30	28	22	55	36	36	49	49	63	38	46	43	45	53	52	47
10	0	0	0	0	0	0	0	0	0	0	33	73	0	0	0	0	0	3	0	11	0	0	0	0	0	61	48	59	0	47	47	11	137	46	4	0	0	6	105	75	0	1	125	0	0	13	68	3	2
32	53	28	26	26	31	14	20	18	30	35	31	28	31	39	25	45	36	35	32	33	29	35	23	25	29	27	22	19	15	25	32	23	11	20	48	17	33	33	26	26	30	31	32	27	24	32	29	15	26
68	75	51	61	48	49	61	51	49	56	69	70	47	51	45	60	64	69	35	23	52	60	57	76	64	75	39	29	37	68	50	63	50	81	59	53	22	49	43	63	46	42	46	64	28	25	42	41	18	20
40	47	40	38	39	51	72	23	62	48	37	43	46	24	67	37	42	23	47	30	40	36	38	39	54	59	7	31	39	28	32	33	14	22	27	22	35	6	22	14	41	51	27	31	51	41	39	42	24	16
24	23	23	31	19	23	31	29	23	33	18	23	31	22	34	24	28	20	39	36	27	27	58	19	28	24	61	30	32	25	34	19	24	13	35	15	27	37	35	48	58	43	56	50	35	21	26	59	10	39
48	39	22	16	13	17	17	9	21	63	58	55	47	61	25	21	35	30	13	39	11	20	22	13	79	21	20	19	24	25	19	22	54	65	62	26	20	53	8	25	54	52	5	26	36	31	23	18	47	46
46	75	50	62	48	42	32	47	56	74	75	80	52	55	65	80	53	64	51	63	63	67	71	52	64	59	56	39	55	72	52	61	37	66	63	71	63	66	40	67	61	45	49	37	34	32	23	34	22	7
34	53	35	43	15	52	33	34	48	73	39	42	27	39	51	61	31	37	20	37	22	26	32	40	35	37	22	17	34	35	23	24	34	73	23	37	47	85	48	48	22	36	36	25	31	36	19	26	45	60
50	45	28	35	33	44	20	26	40	60	28	20	22	33	31	48	52	45	12	36	41	40	33	38	36	37	43	24	34	48	64	49	58	60	50	76	64	81	42	54	45	41	75	71	54	28	23	36	22	29
71	63	70	54	60	67	18	19	56	47	95	95	78	79	70	31	36	24	29	23	11	9	49	11	53	45	58	12	18	20	18	14	44	46	34	15	20	77	52	30	71	62	67	42	22	35	62	53	34	32
47	48	30	39	18	20	50	49	53	51	35	46	51	49	59	52	29	31	16	25	56	45	24	24	48	52	17	6	39	22	52	33	16	12	38	34	52	49	68	28	84	67	8	57	10	51	24	11	12	30
57	47	37	44	33	37	38	47	49	54	42	39	48	34	55	65	36	56	42	58	47	42	38	45	45	53	54	41	41	51	43	40	48	33	67	29	41	48	39	51	45	44	49	60	72	74	68	21	13	23
56	53	53	27	54	52	51	40	42	53	67	71	58	54	62	48	45	54	42	60	49	41	48	57	71	68	65	77	53	69	45	52	38	36	53	31	41	45	52	39	55	53	27	41	57	59	47	26	49	60
24	39	55	53	41	37	20	12	33	39	45	30	47	41	40	41	39	49	56	63	53	53	58	41	53	41	32	52	17	44	54	50	43	28	46	34	51	41	58	25	39	42	49	67	59	72	46	66	31	41
44	43	28	33	37	40	57	50	51	62	45	41	32	37	36	47	37	47	30	53	24	46	49	50	46	55	41	74	12	42	24	47	24	39	34	35	37	47	27	48	32	37	49	43	20	37	20	37	28	39
69	59	45	39	43	62	30	61	41	45	46	68	57	70	37	41	49	44	76	87	44	60	42	42	42	55	64	47	29	38	24	43	45	74	63	72	79	72	27	60	47	44	59	63	55	45	44	51	55	41
36	42	56	42	47	61	27	12	62	65	41	40	74	67	46	59	27	43	51	64	32	48	54	33	31	26	31	25	37	35	28	26	44	44	38	31	56	52	33	53	43	42	58	21	11	16	40	43	9	11
84	93	40	34	22	55	71	102	77	93	50	43	23	30	67	67	34	55	52	42	39	43	30	32	29	83	0	9	7	14	26	38	36	39	12	60	52	65	49	13	26	36	26	24	41	66	29	2	42	17
74	84	57	62	64	73	58	65	58	78	76	72	57	61	42	45	58	60	40	59	52	48	56	53	57	71	44	35	23	53	16	34	29	27	27	37	35	36	64	29	30	49	33	48	14	41	20	12	17	10
82	71	57	56	34	41	63	55	59	69	62	66	58	33	53	48	63	55	54	40	60	58	68	52	73	62	55	46	40	28	60	56	67	54	63	53	67	74	75	47	39	42	71	76	66	52	38	49	6	14
55	77	49	51	29	38	42	76	56	67	36	52	26	39	54	55	56	84	40	49	30	54	59	76	56	78	25	48	37	49	43	41	14	24	41	58	46	59	46	42	17	34	42	44	68	29	35	33	16	18
11	21	27	29	29	33	42	79	49	75	22	32	20	27	23	41	27	26	27	29	49	74	21	29	17	22	14	19	40	24	66	49	24	21	52	58	19	28	14	17	41	45	12	26	32	24	42	45	15	14
56	56	59	21	42	48	91	68	52	55	55	22	52	26	67	37	40	20	53	32	42	54	58	27	69	50	19	17	59	30	38	48	44	43	19	21	33	54	46	37	57	36	49	19	22	33	25	8	20	11
44	47	57	51	67	38	42	22	45	49	59	58	87	42	69	59	28	25	68	49	48	53	54	23	60	46	44	41	31	28	32	48	46	40	45	23	40	35	34	30	73	67	62	30	19	56	17	7	30	27
22	18	55	56	36	37	62	48	63	68	41	58	45	48	35	45	57	48	43	47	49	32	52	49	41	40	45	51	39	26	56	55	48	52	50	58	59	49	40	52	51	61	30	31	12	42	44	54	26	19
21	42	41	23	24	50	34	54	45	40	27	15	25	27	38	38	26	29	18	39	59	26	29	41	50	55	34	30	40	52	30	45	20	10	28	32	20	9	15	37	34	14	26	26	28	24	27	30	13	17
78	80	76	63	66	77	23	33	31	28	59	81	47	56	59	82	71	84	61	74	75	59	60	76	63	84	61	61	21	60	57	63	72	85	76	57	77	36	89	56	27	44	71	38	55	8	6	9	16	10
16	72	57	51	49	50	55	60	46	40	27	35	50	38	49	33	54	60	32	48	26	55	62	35	50	39	52	43	40	54	30	79	21	47	34	74	53	71	22	36	48	37	38	45	21	42	53	36	47	24
33	56	35	31	24	25	16	36	36	50	39	56	51	31	21	42	49	41	46	36	20	39	50	42	32	56	46	37	57	71	33	18	60	34	51	53	18	45	49	22	32	46	51	10	35	46	20	27	26	29
39	37	14	32	19	30	34	32	45	36	54	48	50	58	40	52	18	62	64	69	43	73	33	50	29	21	25	83	12	17	35	53	36	19	43	63	46	59	51	46	36	47	56	68	45	15	31	29	32	30
36	43	73	74	35	53	40	24	55	54	79	73	45	38	38	68	71	72	83	76	72	60	68	64	78	71	44	79	36	39	59	39	29	52	63	49	58	32	46	40	36	37	69	45	58	68	20	31	15	5
56	79	56	54	48	48	61	58	77	75	29	52	48	53	49	50	52	48	45	24	53	58	61	48	42	54	31	26	45	56	34	57	32	56	39	30	47	69	38	63	42	51	14	25	25	31	29	25	23	14
55	28	69	61	81	79	41	43	39	37	66	51	88	78	72	32	46	26	85	54	35	16	79	33	78	44	74	28	51	47	33	24	58	14	24	15	28	9	14	11	46	44	61	53	24	35	68	75	82	56
25	39	48	38	31	32	55	45	48	54	31	36	35	29	25	30	42	42	27	35	34	26	53	42	46	23	33	36	31	12	24	30	21	16	25	32	36	50	26	25	42	50	32	43	36	42	21	26	21	29
41	100	20	44	27	33	48	97	48	42	53	29	20	33	30	37	38	57	29	43	46	19	33	32	43	33	13	21	33	53	16	35	33	28	13	27	19	20	12	13	18	44	14	13	20	24	19	25	26	34
32	20	24	25	34	40	79	77	59	70	37	31	42	42	17	36	21	53	27	35	28	20	31	39	72	64	20	19	50	44	27	28	36	21	25	22	23	18	34	33	35	40	28	28	6	3	32	39	5	5
30	23	20	34	36	22	65	57	88	86	53	23	52	26	49	27	22	42	21	36	25	29	19	36	24	41	24	54	17	59	38	14	23	23	17	66	69	51	33	32	60	47	36	41	20	17	47	31	20	38
60	63	44	58	26	47	42	55	40	62	27	42	34	44	27	53	66	56	21	42	47	41	60	47	66	43	23	44	46	64	50	41	45	21	52	47	25	37	48	33	27	53	31	42	38	44	34	47	28	26
50	44	28	33	36	44	81	11	37	33	22	31	38	37	43	35	42	57	46	27	34	37	37	23	74	43	49	28	30	27	19	23	15	32	17	58	38	21	40	62	40	37	31	25	42	15	40	44	27	12
19	34	43	43	49	47	64	77	68	59	50	40	47	46	34	44	22	73	44	59	28	33	52	39	47	50	56	44	29	38	46	27	35	40	35	45	18	25	49	23	48	46	15	23	19	21	40	41	47	18
38	33	29	27	23	27	21	32	24	31	36	32	24	26	44	31	50	48	44	31	45	46	27	37	31	21	26	28	49	60	50	38	29	42	40	48	57	78	51	60	29	37	34	30	20	23	19	22	24	19
59	68	53	47	39	44	42	30	66	69	54	69	50	59	40	32	50	44	27	24	53	35	49	42	53	39	56	41	42	21	42	28	43	63	20	28	28	47	45	33	66	77	33	30	34	25	21	18	36	11
33	30	24	40	37	40	20	33	42	42	44	41	57	32	35	28	28	32	54	51	59	48	43	26	34	38	11	49	25	30	38	33	26	25	27	23	28	26	27	41	30	48	12	32	31	20	8	34	22	27
41	66	37	26	40	31	75	55	57	86	38	27	31	31	41	36	34	44	34	18	36	47	62	34	19	25	17	35	23	21	16	34	24	44	46	47	26	24	48	20	40	27	54	33	4	15	31	32	5	6
25	44	18	40	31	44	20	25	55	41	38	35	46	48	31	22	44	42	45	51	34	39	57	60	52	49	36	41	19	30	26	38	16	56	22	81	53	70	41	56	37	25	13	17	15	11	22	50	7	2
70	117	59	49	35	34	91	85	69	67	12	6	47	53	88	46	22	91	44	82	70	89	47	31	91	93	3	11	9	29	79	69	104	56	1	49	7	45	7	64	30	38	0	3	0	2	10	13	1	1
65	62	49	70	38	61	30	40	61	71	66	71	58	59	55	52	58	75	72	40	56	66	62	54	50	59	62	57	58	69	48	51	56	69	45	62	47	41	51	50	36	43	57	51	26	13	15	63	10	18
59	47	57	62	60	60	47	46	43	55	62	73	39	46	44	60	48	58	34	39	27	44	53	74	37	41	24	39	18	18	51	57	23	37	18	16	37	24	45	28	57	36	35	33	31	39	24	40	73	47
27	38	58	41	47	41	35	47	50	54	47	55	41	40	26	57	45	15	51	31	20	26	56	27	42	25	50	21	23	24	48	42	41	31	45	60	28	38	28	74	52	48	39	39	47	36	44	49	48	40
64	73	50	41	47	67	52	70	53	63	9	28	28	17	48	41	27	24	26	57	42	61	36	41	46	60	30	56	33	52	37	23	29	52	42	16	37	44	61	65	46	29	72	55	55	68	69	68	50	37
55	60	56	63	35	27	41	38	58	41	55	58	35	32	46	53	34	48	27	30	75	61	55	48	29	69	45	54	17	10	39	41	27	36	33	22	47	28	39	6	38	37	50	48	26	26	24	33	44	20
48	46	46	63	42	44	61	45	42	72	41	43	29	23	32	64	55	27	62	65	39	53	58	56	58	47	48	12	24	21	44	36	8	41	45	30	39	45	17	16	42	27	37	66	14	31	31	23	31	40
61	61	67	64	41	72	34	56	57	69	59	68	69	71	50	62	68	62	31	61	27	48	65	49	52	51	70	55	48	52	14	51	21	17	44	49	54	34	54	18	55	51	52	43	11	32	24	21	20	23
57	71	45	55	45	45	33	54	44	49	56	60	40	49	61	56	47	34	54	57	46	49	38	50	76	70	37	66	58	48	34	57	38	47	36	33	37	42	30	32	30	42	17	55	25	32	25	42	22	30
57	40	27	52	55	43	43	55	67	74	34	65	69	55	54	59	63	55	24	47	43	46	35	49	67	45	24	46	24	55	29	48	50	50	30	46	52	59	50	52	57	54	31	58	25	17	50	56	33	51
17	27	45	55	42	46	11	28	19	34	25	30	48	52	48	56	62	63	44	59	30	50	59	64	35	59	84	46	60	59	15	51	14	34	23	30	3	5	6	36	34	35	21	39	20	31	1	55	27	29
39	56	62	61	51	65	16	35	29	21	61	53	46	67	32	20	54	59	62	57	43	52	56	39	53	63	17	33	38	40	31	22	15	21	24	40	39	40	39	30	40	36	46	54	41	59	61	52	34	10
44	77	58	73	44	53	61	45	76	63	47	55	42	40	25	80	54	69	24	35	34	52	58	61	72	73	34	36	50	87	24	50	24	59	18	39	44	61	52	59	39	18	56	43	33	40	54	50	62	60
52	74	52	31	53	56	49	74	69	80	54	53	55	56	39	48	53	52	58	47	54	57	66	56	51	39	64	61	35	31	36	34	52	26	53	52	47	48	44	68	54	46	54	55	18	32	55	51	21	30
48	52	21	43	28	33	28	36	54	54	50	47	42	33	33	54	50	35	42	37	45	51	33	60	41	57	35	43	36	65	40	43	30	51	44	74	34	23	33	43	28	35	41	68	19	52	38	42	41	36
49	46	46	17	5	7	57	48	57	70	55	64	42	27	12	17	46	49	13	6	55	68	48	52	35	15	35	39	43	33	38	48	15	46	27	44	53	60	24	67	43	54	56	54	20	18	28	36	62	42
25	25	30	36	23	39	31	32	58	57	31	36	40	51	40	60	38	36	54	57	55	45	45	36	49	23	36	42	35	47	39	39	34	35	28	45	42	35	39	37	26	34	13	17	47	45	36	40	29	16
58	57	47	45	45	53	14	80	63	61	60	84	78	70	89	70	26	28	76	67	33	32	34	22	30	24	20	21	30	14	39	40	34	28	32	66	90	84	31	39	70	84	69	35	44	46	35	16	18	9
72	76	48	49	56	47	65	73	79	65	54	47	39	39	74	48	42	69	48	37	42	44	61	47	57	78	52	39	60	59	56	39	59	38	68	77	54	53	41	69	22	18	30	37	14	20	16	16	12	18
41	46	18	37	20	24	38	17	41	47	48	48	23	26	39	40	66	68	22	26	45	76	27	45	39	50	21	27	29	48	32	46	25	46	52	56	27	27	59	48	43	41	62	54	66	85	23	20	33	47
53	70	50	63	50	51	54	67	56	63	44	58	50	53	57	57	59	65	47	64	60	74	75	74	57	67	42	53	38	69	53	52	37	30	40	68	25	45	39	63	36	40	63	34	19	28	32	44	22	18
57	52	63	51	53	56	33	41	80	93	57	62	62	64	28	37	58	50	32	58	23	22	24	42	55	23	43	18	46	56	26	12	21	38	27	40	64	40	38	47	64	61	74	20	56	52	27	44	68	50
56	54	12	25	27	36	33	17	52	40	34	45	33	53	34	43	47	40	73	64	58	65	35	56	23	26	65	85	32	44	37	68	33	64	59	68	64	64	70	70	70	43	35	69	32	42	18	54	9	10
64	76	59	37	59	48	35	35	54	70	64	68	75	53	53	20	18	24	26	58	32	19	34	37	17	36	45	36	28	26	29	26	35	34	30	27	74	70	55	27	74	75	43	32	35	48	37	37	30	29
37	40	35	47	41	46	54	44	72	70	56	53	42	45	35	34	45	53	40	44	20	22	46	28	39	31	42	33	33	47	28	28	38	37	30	31	54	38	40	38	57	48	58	35	51	49	33	53	21	35
62	54	29	25	31	40	26	31	36	18	35	44	47	47	40	38	59	57	49	44	51	52	52	55	33	30	28	41	50	59	51	45	57	56	53	70	61	72	60	72	43	38	59	52	19	33	14	32	18	20
61	76	45	40	59	51	53	60	51	57	50	27	55	55	58	32	33	19	22	49	26	32	30	24	12	21	27	25	8	20	39	18	47	34	41	29	27	55	21	14	55	58	45	30	45	35	63	52	51	45
30	31	17	26	53	63	25	21	32	25	34	20	40	31	53	37	44	40	59	61	56	48	34	65	47	11	57	53	18	43	13	35	12	25	36	10	20	46	37	31	28	19	30	62	41	9	31	7	24	6
56	61	49	57	42	50	36	40	42	45	61	60	46	40	49	59	56	56	51	50	31	51	46	54	41	57	36	51	42	34	51	28	61	53	30	48	67	77	53	61	52	64	51	49	41	49	32	37	13	14
29	35	28	37	59	64	56	50	33	37	43	59	65	60	33	56	53	85	85	77	61	56	78	80	99	90	89	69	42	65	49	46	54	43	91	61	22	23	36	44	26	30	80	76	62	42	46	46	34	33
54	55	40	48	42	46	93	64	61	81	46	52	44	48	48	53	50	72	42	28	47	56	46	41	50	56	23	53	47	42	43	47	46	30	46	45	36	48	61	56	39	50	27	32	31	42	19	35	30	23
50	66	61	41	39	55	42	27	68	66	48	51	31	30	18	52	68	63	57	62	67	73	68	61	63	64	67	70	56	41	61	67	29	35	63	60	13	11	44	56	31	39	30	50	36	35	37	75	33	24
36	40	35	32	35	34	34	32	51	48	41	41	40	35	45	39	46	51	31	39	41	47	40	42	32	38	23	34	9	31	35	45	43	44	35	38	53	65	58	63	58	55	27	45	18	23	37	27	45	57
57	79	50	54	38	45	17	19	67	73	51	65	39	40	37	59	29	52	29	40	37	31	50	51	41	46	60	51	30	41	30	21	42	52	26	14	53	35	47	46	51	50	41	42	16	35	54	47	20	28
30	24	29	36	16	13	79	69	88	69	34	22	28	14	37	51	32	40	30	32	69	69	34	51	71	53	41	34	40	32	45	23	25	9	36	17	36	71	61	66	36	43	44	29	89	88	59	35	39	14
38	35	35	44	40	47	45	36	40	32	47	35	49	45	30	30	56	53	34	34	47	36	54	37	32	43	34	36	41	39	37	39	41	47	44	42	47	40	61	37	32	47	43	35	24	29	29	33	42	43
26	14	36	34	27	35	51	88	56	52	32	38	27	27	50	94	58	94	18	55	89	102	73	63	73	102	32	32	31	82	35	8	35	33	11	3	29	23	12	60	24	5	34	19	14	8	20	22	8	2
45	64	40	43	34	33	85	101	95	96	31	30	32	36	78	38	30	26	25	32	60	30	44	38	58	50	40	32	44	40	30	72	30	39	36	37	68	52	50	49	24	24	20	22	18	23	23	32	22	20
25	25	38	38	40	27	45	34	44	45	38	44	33	37	39	20	42	26	36	36	46	31	55	49	36	34	28	36	50	43	32	31	39	35	32	48	27	20	38	32	27	34	29	31	21	28	18	35	28	22
41	40	42	40	48	31	15	20	32	56	23	25	32	43	46	61	48	19	50	64	60	58	56	60	44	46	26	19	59	39	32	33	36	29	31	38	40	54	43	39	37	46	44	22	24	20	29	23	37	52
73	82	55	65	47	62	46	79	65	56	67	61	53	53	45	63	58	58	53	64	52	44	44	48	52	78	53	48	42	27	39	41	17	24	49	33	13	15	47	9	75	75	16	42	51	59	67	53	23	13
51	44	39	33	30	18	48	43	43	50	24	17	26	14	49	27	50	28	43	12	56	61	50	23	34	26	36	35	50	36	51	29	26	46	32	47	31	44	48	36	30	22	36	31	29	46	28	27	11	7
72	67	72	29	48	48	70	67	39	63	26	20	18	19	21	61	81	57	51	35	37	16	32	60	80	91	30	7	44	49	29	14	19	39	43	28	49	56	49	52	25	26	27	22	38	40	22	18	35	17
57	63	78	57	71	60	78	87	52	72	48	52	46	45	87	73	58	74	75	40	76	50	69	74	62	82	32	47	40	23	53	38	15	17	79	20	12	10	16	16	23	16	11	19	17	26	7	11	8	14
29	48	49	35	60	60	29	35	53	51	47	34	66	48	29	18	43	26	25	30	33	42	65	59	33	35	51	36	55	43	53	69	70	72	51	91	55	72	29	61	63	70	26	74	31	63	21	24	35	59
94	55	80	69	70	49	52	44	57	51	80	51	52	63	72	57	88	48	48	35	59	38	76	57	69	74	75	52	49	52	61	26	36	28	48	40	47	53	45	46	83	52	61	74	63	49	66	62	50	53
44	75	37	40	27	30	36	32	33	27	59	71	57	66	72	33	35	77	68	52	45	77	34	58	32	30	46	80	27	62	31	26	39	64	60	35	7	73	27	56	70	84	66	88	38	76	60	82	38	33
46	48	41	57	21	44	48	38	36	51	39	48	63	49	39	43	43	56	44	43	60	49	46	47	43	44	64	42	29	35	25	51	29	27	45	42	39	34	29	25	62	61	36	54	67	39	49	54	63	41
80	79	65	48	55	52	34	66	73	66	76	55	44	46	54	82	41	39	63	36	73	73	36	67	68	46	83	64	57	53	46	44	33	11	53	33	52	35	49	23	18	21	37	49	6	48	7	31	80	44
20	29	19	26	26	17	10	4	57	74	30	23	35	19	20	28	22	19	43	38	14	20	25	13	20	36	46	19	11	13	10	18	7	19	6	29	15	25	35	9	74	93	26	34	50	101	23	48	80	98
65	85	55	52	52	57	58	66	77	69	67	56	49	56	53	32	61	69	47	60	34	22	50	46	47	56	18	38	56	67	30	44	37	57	54	55	64	71	59	49	44	51	19	45	34	45	23	45	25	9
37	47	33	28	45	46	32	46	34	33	44	46	45	38	34	47	49	27	49	44	61	40	32	44	47	40	60	49	45	53	48	47	65	72	64	53	31	44	59	55	22	12	55	33	57	42	18	11	22	30
31	60	14	32	49	39	34	50	47	63	53	62	54	45	32	33	28	35	26	30	29	66	36	46	31	56	20	55	36	50	37	42	45	35	39	68	53	83	35	66	51	56	29	33	14	61	42	48	36	27
44	49	42	41	37	32	35	40	50	46	42	31	36	28	33	34	32	44	24	17	23	40	40	32	16	35	25	28	21	35	24	32	32	33	31	24	38	24	34	49	20	22	44	28	61	20	75	72	29	46
38	59	49	35	43	50	33	43	48	51	43	47	45	71	60	25	24	49	21	40	42	57	34	32	35	48	20	24	32	52	36	50	18	49	18	39	33	68	18	47	62	70	29	35	18	40	23	28	60	44
51	57	73	69	71	62	43	28	61	55	54	55	79	72	58	69	37	50	52	72	29	39	57	51	33	56	64	71	29	40	42	25	43	59	54	31	26	42	43	44	62	64	69	54	53	69	89	70	72	58
24	24	24	29	16	21	22	23	31	37	22	34	19	37	24	23	33	16	37	33	45	37	29	20	22	17	15	24	32	24	45	30	36	23	70	58	72	53	40	52	35	34	68	61	51	33	61	51	43	26
31	32	42	33	49	39	28	31	41	61	34	28	42	47	30	27	52	38	26	30	21	34	35	36	33	41	35	45	47	48	41	33	52	58	57	60	67	44	30	28	50	52	79	57	41	54	46	42	66	56
53	66	53	34	50	47	39	40	70	39	66	53	58	51	29	36	41	36	27	51	45	35	51	33	33	35	30	33	44	39	24	28	52	56	56	47	64	83	43	71	63	59	68	63	71	65	57	53	71	62
75	79	19	14	21	11	71	101	79	96	36	21	27	18	95	45	47	55	24	54	67	85	30	24	94	61	36	23	46	65	34	25	22	38	16	40	50	58	27	67	16	15	9	10	10	5	13	19	31	14
19	60	46	41	41	31	40	56	52	71	41	43	45	36	63	34	54	42	36	41	59	42	58	39	52	43	58	59	34	24	51	46	30	30	30	23	34	83	16	47	52	48	52	50	40	31	51	60	21	16
46	45	44	50	50	52	35	28	67	45	49	58	56	55	38	66	63	58	59	57	25	15	58	54	32	31	38	59	41	50	44	42	76	39	37	54	33	46	64	57	49	62	54	18	40	27	55	42	54	56
43	40	45	48	53	49	57	61	64	57	51	42	48	49	33	41	47	51	49	36	51	43	56	44	30	47	49	42	44	49	46	58	36	49	46	23	66	45	65	58	42	42	53	35	42	32	45	37	29	32
62	74	57	49	68	74	46	46	49	47	78	79	65	80	70	50	65	46	73	81	18	66	34	84	41	24	61	57	36	15	7	60	17	52	64	29	34	17	19	26	24	31	14	65	16	23	37	46	11	13
49	67	55	46	41	31	85	90	69	35	29	33	44	37	34	50	39	50	28	32	25	60	56	22	80	65	54	51	49	74	28	43	16	20	26	46	20	41	81	72	26	30	33	29	35	43	33	39	9	8
38	43	48	42	52	50	33	39	57	57	55	66	54	66	48	52	41	62	59	52	52	65	50	67	55	44	26	35	28	62	51	59	44	45	47	48	62	48	42	57	46	39	14	36	12	31	27	70	15	33
75	60	51	28	26	28	38	68	53	56	81	42	43	46	9	32	29	20	8	14	21	20	18	26	49	21	14	22	34	51	17	23	34	56	0	15	91	59	38	34	39	47	51	34	52	46	34	29	54	59
44	67	29	56	71	77	60	51	55	50	65	70	70	76	42	34	52	34	27	50	38	43	63	74	49	34	69	72	48	17	51	71	46	48	58	56	34	48	39	35	74	73	58	69	48	66	70	57	55	65
23	22	21	22	23	22	22	24	38	33	24	26	33	27	24	21	39	46	23	23	19	23	21	23	26	34	30	16	48	44	11	23	67	32	48	30	46	27	49	33	58	47	66	52	38	49	14	38	37	16
53	60	65	29	44	56	30	37	39	53	60	68	68	50	15	42	70	82	21	37	43	44	66	67	54	54	48	30	67	57	57	69	60	44	42	48	54	58	52	46	83	85	57	63	36	63	79	67	39	19
43	78	38	53	12	27	62	46	46	83	28	28	17	23	12	24	39	35	9	18	10	42	22	36	22	70	8	42	41	17	15	29	11	11	7	47	19	28	11	19	60	64	29	47	23	61	12	12	21	41
21	10	20	36	21	15	55	67	70	47	25	39	51	54	24	16	46	41	44	23	36	41	29	42	14	71	63	56	21	22	14	11	30	25	43	55	19	56	28	75	53	54	52	10	59	46	84	31	36	62
37	36	28	25	42	38	57	61	58	56	41	32	48	48	39	39	49	36	32	21	29	31	67	35	59	44	68	59	50	35	50	47	48	35	43	36	39	39	59	59	53	54	43	21	33	26	34	55	21	23
52	64	52	67	55	68	58	73	60	66	60	74	55	53	39	59	59	81	50	67	56	78	67	59	56	80	59	64	69	78	65	82	53	76	51	60	42	35	68	69	39	49	33	79	44	41	29	53	14	20
53	47	43	43	55	49	49	46	52	60	52	60	43	50	39	45	56	62	25	49	27	39	49	47	40	42	42	39	37	35	35	31	37	45	35	44	55	52	32	48	52	37	48	38	36	32	27	28	18	13
29	49	41	46	46	40	45	37	29	35	35	50	34	43	37	49	58	50	36	40	40	59	45	48	57	39	32	46	55	51	41	58	34	45	62	54	42	66	27	55	44	43	59	49	53	61	51	40	57	24
54	48	67	50	63	62	42	55	53	63	58	62	61	50	16	38	35	37	20	37	33	28	41	61	66	54	38	28	64	32	53	43	23	55	12	42	41	28	45	56	45	70	65	27	28	43	36	39	33	34
45	23	25	35	60	58	24	35	32	30	23	51	24	49	38	33	32	56	66	55	45	41	58	62	54	73	39	42	34	43	29	26	20	34	43	44	70	51	49	42	26	37	40	36	29	36	13	19	2	36
38	23	59	49	37	8	36	11	66	80	87	65	42	52	96	37	46	38	56	22	65	61	45	34	63	41	16	15	80	36	56	49	35	37	26	29	105	88	100	46	35	25	40	13	13	22	5	15	6	8
24	73	40	40	26	10	40	55	25	35	32	36	6	26	21	11	47	29	17	22	37	71	48	75	89	98	28	18	35	45	29	34	42	51	54	44	27	74	56	34	27	24	83	45	41	52	53	24	55	6
52	51	62	45	47	56	36	22	43	55	59	73	48	44	28	41	58	39	48	46	48	39	65	67	47	27	62	57	39	29	39	48	42	21	52	55	54	19	26	42	63	59	26	36	17	30	36	33	25	26
64	80	66	68	62	73	34	54	68	65	83	78	69	54	48	59	78	65	56	63	54	31	76	81	55	52	29	50	66	52	32	31	44	32	50	29	64	71	70	62	38	59	59	77	8	31	34	20	22	16
43	82	42	48	83	63	17	28	42	54	71	83	81	70	61	46	55	71	45	48	29	33	51	43	26	40	39	43	27	44	29	31	36	39	26	37	28	76	32	34	55	65	33	39	22	35	71	62	21	24
19	33	33	46	45	60	64	47	64	62	45	49	44	67	42	51	31	43	27	43	45	47	42	50	27	35	30	24	28	22	22	35	15	40	40	35	21	27	40	44	70	55	52	50	38	23	27	30	54	48
45	48	47	46	58	59	34	36	40	47	54	45	40	38	54	60	56	55	38	56	51	47	54	54	55	48	29	42	24	39	50	43	51	53	54	55	53	68	45	63	29	39	52	56	67	54	60	32	25	20
35	37	56	52	58	46	48	44	51	51	45	58	54	56	21	57	38	67	44	50	30	44	19	41	30	41	44	55	28	38	20	35	45	37	43	49	49	56	27	43	58	62	52	32	14	32	13	29	40	25
17	28	21	27	16	16	19	21	41	42	34	22	41	21	22	22	60	32	79	49	60	70	25	23	21	49	40	60	57	23	46	74	15	65	54	67	58	41	44	55	47	58	86	79	72	79	16	11	32	29
33	27	18	11	23	15	28	28	58	59	29	28	25	24	19	18	19	35	19	15	22	14	16	29	14	31	29	19	58	40	20	16	22	27	21	36	31	21	16	33	37	35	9	47	22	34	32	27	31	7
45	59	38	39	48	42	53	75	69	73	35	44	46	46	35	75	27	52	36	48	45	52	27	28	38	50	40	38	40	76	31	72	34	64	47	70	35	85	33	58	32	46	53	50	28	18	42	50	35	8
57	68	72	40	44	49	50	49	36	40	79	60	45	58	62	43	81	55	41	30	56	44	54	57	56	46	44	57	63	21	28	38	32	23	37	39	31	49	62	55	45	51	53	48	42	61	39	55	20	15
41	31	50	59	46	55	35	17	62	48	57	56	51	59	46	65	44	35	49	56	37	39	68	55	36	45	42	60	24	39	30	32	18	30	36	44	64	33	26	45	66	63	31	49	33	43	44	61	38	30
24	56	34	50	47	50	60	56	62	56	59	60	41	47	44	46	45	33	52	41	53	44	50	51	38	35	56	54	21	39	20	20	18	31	40	36	36	49	47	43	38	36	48	54	54	70	43	28	43	39
31	81	52	40	39	46	28	41	39	39	50	51	50	48	18	38	42	68	37	65	40	45	50	65	35	62	24	45	43	62	31	39	49	46	44	38	33	37	37	52	64	56	53	46	21	30	32	54	36	32
31	30	29	35	27	31	32	45	20	29	41	51	32	49	38	22	36	34	45	38	31	36	38	52	22	39	49	30	27	31	20	36	21	42	32	23	25	50	30	59	39	54	47	22	51	31	38	36	15	27
36	44	36	48	52	56	30	45	34	37	42	60	48	58	10	37	68	88	62	37	41	51	44	48	58	84	71	35	42	26	66	64	59	68	59	41	29	38	51	19	33	59	36	60	43	72	14	6	15	20
29	62	70	63	69	68	39	72	56	46	76	63	77	70	45	43	66	20	80	49	14	50	77	58	46	61	69	70	13	64	23	9	43	10	43	25	19	46	32	59	63	68	52	52	28	26	20	5	37	21
47	36	43	34	53	33	74	72	72	60	54	48	39	40	57	27	49	64	46	39	54	54	40	32	46	68	25	49	50	54	56	53	37	47	43	45	39	51	53	30	46	31	23	46	18	17	31	26	9	11
58	80	61	58	37	33	28	24	39	48	63	83	15	36	38	39	48	26	15	17	26	22	69	40	44	33	10	20	55	73	36	45	61	40	59	67	67	75	53	33	56	85	64	52	17	21	17	25	39	36
55	68	48	36	42	51	52	49	28	71	54	66	42	29	3	22	56	55	32	27	45	51	59	52	36	46	17	24	32	41	34	26	40	59	48	26	60	79	42	72	52	60	56	55	61	58	24	58	36	20
20	53	33	51	53	40	45	52	68	45	54	72	53	60	16	42	36	25	40	57	47	55	36	25	34	43	25	31	22	29	51	33	20	21	62	18	30	35	26	18	65	80	25	29	34	4	21	39	59	20
21	15	19	57	27	27	76	92	27	71	15	15	12	30	57	60	24	36	23	49	25	72	28	52	41	39	19	25	18	32	19	31	18	21	26	11	75	95	62	47	48	71	40	52	10	21	9	13	28	18
48	37	56	46	59	36	63	77	64	78	59	39	63	53	63	42	58	35	36	26	41	18	47	40	36	23	49	25	40	23	25	22	35	38	44	50	50	52	54	28	53	47	58	46	51	55	42	16	16	21
29	32	59	60	62	59	12	19	22	35	75	81	62	71	49	70	60	73	25	54	35	34	50	54	39	53	58	42	26	52	21	27	53	56	46	62	44	58	40	56	58	66	57	49	42	72	52	63	80	46
20	21	13	14	12	12	17	15	29	26	19	26	26	26	12	21	44	42	40	23	53	63	9	18	15	20	52	53	43	72	75	77	44	58	73	55	70	78	67	71	82	86	51	55	58	66	85	84	79	72
61	60	30	60	71	83	50	65	82	97	62	81	45	82	79	85	35	60	50	80	46	62	39	65	52	84	29	75	36	38	35	73	39	50	35	50	40	54	47	56	80	56	40	45	41	69	34	19	22	17
33	27	67	64	58	58	27	19	58	59	69	63	65	59	58	27	62	51	56	38	18	18	34	31	56	54	44	44	22	26	20	17	33	34	55	58	37	35	46	25	61	53	79	67	50	46	60	38	45	19
54	60	58	83	69	79	26	43	58	51	74	80	79	78	41	48	62	71	65	55	52	45	45	38	52	57	59	64	41	79	56	46	66	85	38	44	70	46	58	54	79	64	63	47	23	31	60	70	44	19
11	23	19	25	28	39	33	43	38	31	22	23	54	57	26	25	31	25	35	25	22	31	30	24	32	34	36	18	43	37	22	40	39	25	26	34	40	48	33	43	50	55	47	26	29	19	28	35	38	21
85	86	72	65	76	81	48	58	48	34	65	43	37	46	65	51	80	57	55	41	50	47	85	66	57	71	33	61	30	43	65	61	78	92	70	44	49	50	55	53	47	55	50	44	75	74	12	39	44	39
60	67	60	77	43	57	16	27	64	56	63	50	52	53	43	35	62	67	63	67	42	46	53	67	48	64	38	46	56	44	45	46	55	52	57	36	59	37	57	55	66	51	57	44	40	57	54	26	9	4
71	71	72	50	42	48	57	81	72	80	84	84	38	40	43	57	68	82	42	50	76	59	75	61	83	92	40	65	74	77	86	51	41	37	66	33	35	40	79	93	51	33	50	52	19	39	33	38	2	2
44	40	41	16	57	24	70	77	65	61	21	17	36	40	63	43	57	22	44	39	43	25	41	23	88	77	36	58	46	22	47	93	57	24	19	48	65	38	45	32	38	27	15	27	24	18	28	8	14	20
57	79	62	78	45	72	65	56	55	49	62	92	61	62	72	105	81	105	43	65	72	68	73	59	96	80	50	69	82	67	41	56	34	29	28	48	58	44	32	28	37	35	12	41	54	44	48	65	30	19
55	58	39	46	52	55	65	85	68	72	23	44	49	50	46	50	60	59	43	37	47	42	51	54	72	95	34	33	60	37	26	28	36	29	56	18	40	33	36	47	52	51	40	42	59	18	54	26	45	43
64	56	54	64	62	67	56	63	48	46	63	64	75	67	62	67	58	52	70	56	34	41	65	62	69	43	62	44	38	35	29	32	47	40	37	28	49	29	46	42	40	45	39	60	31	60	28	57	16	17
49	66	79	78	57	87	27	76	25	56	85	86	46	61	72	84	67	90	45	85	66	88	66	93	47	65	54	68	63	65	44	63	54	67	46	87	39	47	40	66	49	62	64	72	49	52	18	61	52	59
25	37	69	57	68	71	27	47	38	45	67	31	74	74	39	51	43	44	63	60	30	28	75	45	40	35	76	54	35	25	55	29	70	39	31	41	16	23	42	34	64	78	72	66	31	32	70	75	17	23
97	91	58	31	45	41	49	50	94	87	69	79	45	59	75	36	55	37	53	41	83	53	43	29	59	42	33	6	37	30	29	25	30	45	26	48	39	57	23	44	29	19	23	33	8	9	35	27	34	19
44	35	20	15	26	23	36	25	52	45	51	68	57	75	49	28	62	59	58	59	64	44	42	46	33	27	25	57	57	44	58	44	39	45	56	31	46	53	58	44	40	60	49	23	16	29	11	12	47	41
42	39	33	29	28	27	47	45	52	54	33	39	40	36	34	44	54	54	27	21	51	53	35	56	35	50	24	20	34	46	44	32	39	32	57	32	31	38	37	32	45	43	50	51	46	63	61	19	47	39
35	26	47	43	49	49	45	10	66	58	36	42	47	41	50	47	62	45	58	63	42	43	57	55	45	47	56	57	25	50	32	24	28	27	42	40	50	45	29	53	44	35	31	34	55	53	38	48	34	14
23	49	48	32	54	46	46	39	26	44	51	40	54	53	45	33	49	51	36	37	38	29	50	45	40	47	48	35	47	55	43	34	46	44	36	54	20	29	52	58	53	60	48	36	18	9	40	42	27	31
34	64	33	23	33	34	46	31	68	90	36	36	20	43	30	56	34	29	33	29	68	20	43	31	39	19	18	31	30	22	28	12	28	26	28	15	57	36	37	28	34	43	25	39	29	35	40	55	23	37
69	79	68	39	48	51	62	54	58	54	47	40	40	29	33	69	52	44	41	41	44	46	48	59	54	58	49	16	39	45	24	17	26	21	21	30	34	30	39	55	31	38	31	18	21	13	41	29	12	21
32	62	53	60	54	50	53	53	63	67	76	63	33	50	66	64	62	38	67	72	23	53	60	58	49	55	59	59	44	45	27	58	40	26	32	15	33	37	40	24	20	40	26	36	14	49	18	33	7	4
65	81	34	36	36	38	38	49	60	50	45	45	45	35	58	59	40	55	29	56	35	62	43	56	47	36	55	37	30	53	34	54	55	86	58	63	96	72	93	48	34	38	59	52	24	39	16	32	40	18
31	22	61	51	59	77	42	49	55	48	72	40	73	61	27	33	56	59	43	51	48	32	78	45	37	56	46	44	56	31	43	39	60	64	40	34	50	35	57	30	56	52	57	31	61	19	14	53	43	14
17	29	23	64	33	25	27	13	25	53	33	45	45	40	50	60	48	28	17	35	17	32	58	19	28	79	19	30	27	39	13	34	10	33	11	18	31	12	30	37	32	25	8	20	17	20	41	45	33	12
43	47	44	36	43	36	24	56	21	80	43	25	47	38	40	31	40	32	38	32	26	39	54	36	34	42	50	32	38	35	38	19	36	60	40	18	22	25	32	37	50	40	32	31	11	17	32	41	8	16
28	28	28	24	30	22	20	31	51	49	28	16	34	39	27	36	28	36	21	34	30	28	30	31	32	53	17	17	22	64	26	26	33	36	31	34	29	30	36	44	23	22	25	29	20	31	31	26	16	11
24	29	15	14	11	10	20	22	21	24	19	30	30	31	20	21	23	29	31	22	38	34	22	33	16	31	36	27	28	36	27	32	24	38	40	35	38	49	35	55	24	20	46	45	20	20	31	30	28	11
44	47	42	73	54	52	39	27	61	64	54	66	36	70	26	55	44	46	37	58	39	56	56	43	62	39	34	42	25	53	36	60	42	55	52	34	28	28	25	45	52	65	55	33	21	21	27	10	12	44
54	76	57	66	63	48	9	9	45	19	45	70	57	77	55	49	66	45	59	72	74	75	24	30	57	69	72	87	57	72	41	37	84	52	72	55	55	56	72	73	56	67	49	38	43	68	51	45	21	8
[truncated: 225 more columns]
